# Supplementary material for: Borylation of fluorinated arenes using the boron-centred nucleophile B(CN)3 2– – a unique entry to aryltricyanoborates
Source: PubMed Central journal article supplement (PMC5620525; doi:10.1039/c7sc02249b), 2017-06-26
Supplement: SC-008-C7SC02249B-s001.pdf [file SC-008-C7SC02249B-s001.pdf]

# Supporting information

Borylation of Fluorinated Arenes with the Boron-centred Nucleophile  $\text{B}(\text{CN})_3^{2-}$   
– a Unique and Convenient Access to Aryltricyanoborates

*Johannes Landmann,<sup>a</sup> Philipp T. Hennig,<sup>a</sup> Nikolai V. Ignat'ev,<sup>b</sup> and Maik Finze<sup>\*a</sup>*

## Affiliations

<sup>a</sup> Institut für Anorganische Chemie, Institut für nachhaltige Chemie & Katalyse mit Bor (ICB), Julius-Maximilians Universität Würzburg, Am Hubland, 97074 Würzburg, Germany.

Web: <https://go.uni-wue.de/finze-group>. E-mail: [maik.finze@uni-wuerzburg.de](mailto:maik.finze@uni-wuerzburg.de).

<sup>b</sup> Consultant, Merck KGaA, Frankfurter Straße 250, 64293 Darmstadt, Germany

\*Correspondence to: [maik.finze@uni-wuerzburg.de](mailto:maik.finze@uni-wuerzburg.de).

## Table of Contents

|                                                         |     |
|---------------------------------------------------------|-----|
| 1. General Synthetic Aspects                            | S3  |
| 2. Analytical Instruments and Details                   | S3  |
| 3. Chemicals                                            | S4  |
| 4. Syntheses                                            | S4  |
| 5. Table of Experimental and Calculated Chemical Shifts | S24 |
| 6. Crystal Structure Determinations                     | S27 |
| 7. Experimental and Calculated Bond Lengths             | S30 |
| 8. References                                           | S32 |

## 1. General Synthetic Aspects

Reactions involving air-sensitive compounds were performed either in round bottom flasks or in glass tubes equipped with valves with PTFE stems (Rettberg, Göttingen and Young, London) under argon using standard Schlenk line techniques.

## 2. Analytical Instruments and Details, DFT Calculations

$^1\text{H}$ ,  $^{11}\text{B}$  and  $^{13}\text{C}$  NMR spectra were recorded at 25 °C in  $(\text{CD}_3)_2\text{CO}$  on a Bruker Avance 500 or on a Bruker Avance III HD 300 spectrometer. NMR signals were referenced against TMS ( $^1\text{H}$  and  $^{13}\text{C}$ ;  $\Xi(^{13}\text{C}) = 25.145020$  MHz) and  $\text{BF}_3 \cdot \text{OEt}_2$  in  $\text{CDCl}_3$  ( $\Xi(^{11}\text{B}) = 32.083974$  MHz).<sup>1</sup> Chemical shifts were calibrated against the residual solvent signal and the solvent signal, respectively ( $\delta(^1\text{H})$ :  $(\text{CD}_2\text{H})(\text{CD}_3)\text{CO}$  2.05 ppm;  $\delta(^{13}\text{C})$ :  $(\text{CD}_3)_2\text{CO}$  206.26 and 29.84 ppm.<sup>2</sup> The labeling of the nuclei according to Figure S1.

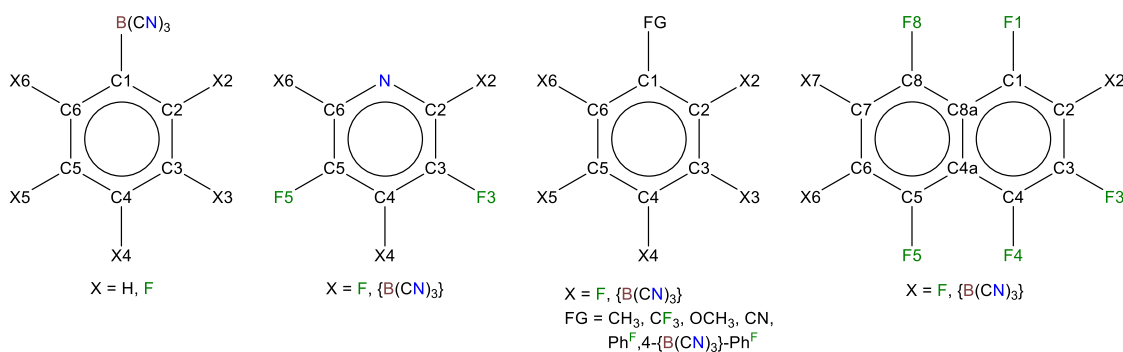

**Figure S1.** Labeling of the nuclei and positions of the borate anions.

The assignment of the NMR signals is aided by chemical shifts derived from DFT calculations.<sup>3</sup> DFT-GIAO<sup>4</sup> NMR shielding constants  $\sigma(^{11}\text{B})$ ,  $\sigma(^{13}\text{C})$ ,  $\sigma(^1\text{H})$  and  $\sigma(^{19}\text{F})$  were calculated at the B3LYP/6-311++G(2d,p) level of theory using the geometries computed at the B3LYP/6-311++G(d,p) level of theory. The  $^{11}\text{B}$ ,  $^{13}\text{C}$ ,  $^1\text{H}$  and  $^{19}\text{F}$  NMR shielding constants were calibrated to the respective chemical shift scale  $\delta(^{11}\text{B})$ ,  $\delta(^{13}\text{C})$ ,  $\delta(^1\text{H})$  and  $\delta(^{19}\text{F})$  using predictions on diborane(6),  $\text{Me}_4\text{Si}$ , and  $\text{CFCl}_3$  with chemical shifts of 16.6 ppm for  $\text{B}_2\text{H}_6$ <sup>5</sup> and 0 ppm for  $\text{Me}_4\text{Si}$  and  $\text{CFCl}_3$ .<sup>6</sup> All calculations were performed using the Gaussian09 program suite.<sup>7</sup>

Elemental analyses (C, H, N) were performed either with a Euro EA3000 instrument (HEKA-Tech, Germany) or with an Elementar Vario MICRO cube instrument (Elementar Analysensysteme, Germany).

### 3. Chemicals

All standard chemicals were obtained from commercial sources and used without further purification. Solvents were dried according to standard protocols<sup>8</sup> and stored in flasks equipped with valves with PTFE stems (Young, London) under an argon atmosphere.  $K_2B(CN)_3$  (**K<sub>2</sub>1**) was synthesized according to known procedures.<sup>9</sup>

### 4. Syntheses

#### General procedures for the syntheses of the borates.

If not stated otherwise, the synthesis of the borate anions were performed according to method A (without LiCl) or method B (in the presence of LiCl). The work-up procedure described for method B was applied for the removal of  $[BH(CN)_3]^-$ , in general.

**Method A:**  $K_2B(CN)_3$  (**K<sub>2</sub>1**) was suspended in THF (5–8 mL). The fluoroarene was added in a single portion at room temperature either as neat compound (liquid fluoroarenes) or as a solution in THF (solid fluoroarenes) using a syringe. The end of the reaction was either evident from decolorization of **1** (yellow compound) or by  $^{19}F$  and  $^{11}B$  NMR spectroscopy. For the NMR spectroscopic control experiments, a small sample of the suspension was taken while stirring and dissolved in  $H_2O$  to give a clear solution. Residual solid **1** was converted into  $[BH(CN)_3]^-$  and the hydridoborate anion was detected by  $^{11}B$  NMR spectroscopy. If necessary, the reaction mixture was stirred at elevated temperatures.

All solid material that had formed (mainly KF) was separated by filtration through a plug of Celite. The Celite plug was washed with THF ( $3 \times 5$ – $10$  mL), the solvent of the combined THF layers was removed, and the residue was dried in a vacuum (removal of excess arene). The residue was dissolved in THF (5 mL) again and the product was precipitated by slow addition of  $CH_2Cl_2$ . Fractional precipitation allowed the separation of by- and/or side products. The off-white to colourless solids were dried in a vacuum.

**Method B:** In contrast to method A, LiCl (ca. 1.5 equivalents) was added to the reaction mixture. After completion of the reaction (see method A) the combined THF layers were dried in a vacuum. The residue was dissolved in slightly acidified  $H_2O$  (ca. 20 mL) and an aqueous solution of an excess of  $[Me_3NH]Cl$  or  $[Et_3NH]Cl$  was slowly added, which resulted in the precipitation of the respective organic salt either as a solid that was filtered off or the formation of an oily material. In the latter case the mixture was extracted with  $CH_2Cl_2$  ( $3 \times 15$

mL) and the combined organic layers were washed with H<sub>2</sub>O (5 × 2 mL). After removal of all volatiles the oily remainder of the CH<sub>2</sub>Cl<sub>2</sub> phases, H<sub>2</sub>O (25 mL) and an excess of K<sub>2</sub>CO<sub>3</sub> was added in several portions. After dissolution, the mixture was concentrated under reduced pressure until K<sub>2</sub>CO<sub>3</sub> began to precipitate. The mixture was extracted with THF (3 × 20 mL), the combined organic layers were dried with K<sub>2</sub>CO<sub>3</sub>, filtered and concentrated to a volume of ~5 mL. CH<sub>2</sub>Cl<sub>2</sub> (20 mL) was added and an off-white to colourless precipitate formed that was collected by filtration and dried in a vacuum.

**K[1-{(NC)<sub>3</sub>B}-C<sub>6</sub>H<sub>5</sub>] (KB1):** Method B was employed for the preparation of **KB1**, using

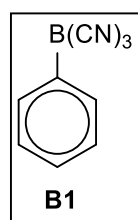

fluorobenzene (ca. 0.5 mL, 5.4 mmol), K<sub>2</sub>1 (200 mg, 1.20 mmol) and LiCl (150 mg, 3.54 mmol). The reaction mixture was heated to 80 °C for 2 days. Yield: 110 mg (0.536 mmol, 45%). <sup>11</sup>B NMR (160.5 MHz, (CD<sub>3</sub>)<sub>2</sub>CO): δ = -28.9 ppm (s, 1B). <sup>1</sup>H NMR (500.1 MHz, (CD<sub>3</sub>)<sub>2</sub>CO): δ = 7.54–7.49 (m, 2H, H2/6), 7.28–7.24 (m, 2H, H3/5), 7.21–7.16 ppm (m, 1H, H4). <sup>1</sup>H{<sup>11</sup>B} NMR (500.1 MHz, (CD<sub>3</sub>)<sub>2</sub>CO): δ = 7.54–7.49 (m, 2H, H2/6), 7.28–7.24 (m, 2H, H3/5), 7.21–7.16 ppm (m, 1H, H4). <sup>13</sup>C{<sup>1</sup>H} NMR (125.8 MHz, (CD<sub>3</sub>)<sub>2</sub>CO): δ = 140.6 (q, 1C, <sup>1</sup>J(<sup>13</sup>C, <sup>11</sup>B) = 56 Hz, C1), 133.3 (s, 2C, C2/6), 129.7 (q, 3C, <sup>1</sup>J(<sup>13</sup>C, <sup>11</sup>B) = 64 Hz, CN), 128.3 (s, 2C, C3/5), 127.2 ppm (s, 1C, C4). Elemental analysis: calculated (%) for C<sub>9</sub>H<sub>5</sub>BKN<sub>3</sub>, C 52.71, H 2.46, N 20.49; found, C 51.89, H 2.55, N 20.77. (-)-ESI-MS, m/z, [(C<sub>6</sub>H<sub>5</sub>)B(CN)<sub>3</sub>]<sup>-</sup>: calculated 166.06 (100.0%), 165.06 (24.8%), 167.06 (9.7%); found 166.06 (100.0%), 165.06 (25.5%), 167.06 (9.7%).

**K[1-{(NC)<sub>3</sub>B}-2-F-C<sub>6</sub>H<sub>4</sub>] (KB2a):** Method B was employed for the preparation of **KB2a**,

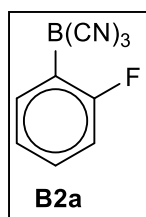

using 1,2-difluorobenzene (0.5 mL, 5.1 mmol), K<sub>2</sub>1 (350 mg, 2.10 mmol) and LiCl (150 mg, 3.54 mmol). The reaction mixture was stirred at room temperature overnight. Yield: 270 mg (1.21 mmol, 58%). <sup>11</sup>B NMR (160.5 MHz, (CD<sub>3</sub>)<sub>2</sub>CO): δ = -30.8 ppm (s, 1B). <sup>11</sup>B{<sup>1</sup>H} NMR (160.5 MHz, (CD<sub>3</sub>)<sub>2</sub>CO): δ = -30.8 ppm (d, 1B, <sup>3</sup>J(<sup>19</sup>F, <sup>11</sup>B) ≈ 8 Hz). <sup>1</sup>H NMR (500.1 MHz, (CD<sub>3</sub>)<sub>2</sub>CO): δ = 7.54 (s, br, 1H, H6), 7.30–7.25 (m, 1H, H4), 7.09 (dddd, 1H, J = 7.4 Hz (2×), 1.1 Hz, 0.4 Hz, H5), 6.96 ppm (ddd, br, 1H, J = 9.4 Hz, 8.2 Hz, 1.1 Hz, H3). <sup>1</sup>H{<sup>11</sup>B} NMR (500.1 MHz, (CD<sub>3</sub>)<sub>2</sub>CO): δ = 7.54 (dddd, 1H, J = 7.4 Hz, 6.8 Hz, 1.9 Hz, 0.3 Hz, H6) [other signals as stated for the <sup>1</sup>H NMR spectrum]. <sup>19</sup>F NMR (470.6 MHz, (CD<sub>3</sub>)<sub>2</sub>CO): δ = -105.1 ppm (s, 1F). <sup>13</sup>C{<sup>1</sup>H} NMR (125.8 MHz, (CD<sub>3</sub>)<sub>2</sub>CO): δ = 166.3 (d, 1C, <sup>1</sup>J(<sup>19</sup>F, <sup>13</sup>C) = 243 Hz, C2), 135.4 (d, 1C, <sup>3</sup>J(<sup>19</sup>F, <sup>13</sup>C) = 8.8 Hz, C6), 130.0 (d, 1C, <sup>3</sup>J(<sup>19</sup>F, <sup>13</sup>C) = 8.3 Hz, C4), 128.5 (q, 3C, <sup>1</sup>J(<sup>13</sup>C, <sup>11</sup>B) = 65 Hz, CN),

126.2 (qd, 1C,  $^1J(^{13}\text{C}, ^{11}\text{B}) = 56$  Hz,  $^2J(^{19}\text{F}, ^{13}\text{C}) \approx 23$  Hz, C1), 124.4 (s, 1C, C5), 115.1 ppm (d, 1C,  $^2J(^{19}\text{F}, ^{13}\text{C}) \approx 24$  Hz, C3).  $^{13}\text{C}\{^{19}\text{F}\}$  NMR (125.8 MHz,  $(\text{CD}_3)_2\text{CO}$ ):  $\delta = 166.3$  (dddd, 1C,  $J(^{13}\text{C}, ^1\text{H}) = 11$  Hz ( $2\times$ ), 4.5 Hz, 1.7 Hz, C2), 135.4 (ddd, 1C,  $^1J(^{13}\text{C}, ^1\text{H}) = 159$  Hz,  $J(^{13}\text{C}, ^1\text{H}) = 8.7$  Hz, 2.1 Hz, C6), 130.7–129.3 (m, 1C, C4), 128.5 (q, 3C,  $^1J(^{13}\text{C}, ^{11}\text{B}) = 65$  Hz, CN), 126.2 (q, 1C,  $^1J(^{13}\text{C}, ^{11}\text{B}) = 56$  Hz, C1), 124.4 (dm, 1C,  $^1J(^{13}\text{C}, ^1\text{H}) = 159$  Hz, C5), 115.1 ppm (dd, 1C,  $^1J(^{13}\text{C}, ^1\text{H}) = 161$  Hz,  $^2J(^{13}\text{C}, ^1\text{H}) = 8.1$  Hz, C3). Elemental analysis: calculated (%) for  $\text{C}_9\text{H}_4\text{BFKN}_3$ , C 48.46, H 1.81, N 18.84; found, C 48.17, H 1.62, N 18.72. (–)-ESI-MS,  $m/z$ ,  $[(\text{C}_6\text{FH}_4)\text{B}(\text{CN})_3]^-$ : calculated 184.05 (100.0%), 183.05 (24.8%), 185.05 (9.7%); found 184.05 (100.0%), 183.05 (25.2%), 185.05 (9.6%). Crystals of **KB2a** suitable for an X-ray diffraction study were obtained from an acetone solution by slow evaporation of the solvent.

**K[1- $\{(\text{NC})_3\text{B}\}$ -3-F- $\text{C}_6\text{H}_4$ ] (KB2b):** Method B was employed for the preparation of **KB2b**,

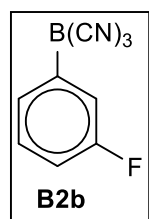

using 1,3-difluorobenzene (0.4 mL, 4.1 mmol), **K<sub>2</sub>1** (300 mg, 1.80 mmol) and LiCl (115 mg, 2.71 mmol). The reaction mixture was stirred at room temperature for 3 days. Yield: 280 mg (1.26 mmol, 70%).  $^{11}\text{B}$  NMR (160.5 MHz,  $(\text{CD}_3)_2\text{CO}$ ):  $\delta = -29.1$  ppm (s, 1B).  $^1\text{H}$  NMR (500.1 MHz,  $(\text{CD}_3)_2\text{CO}$ ):  $\delta = 7.36$ – $7.28$  (m, 2H), 7.19 (d, br, 1H,  $^2J(^{19}\text{F}, ^1\text{H}) \approx 10$  Hz), 6.97–6.92 ppm (m, 1H) [A definite assignment even with the aid of calculated chemical shifts was not possible].  $^{19}\text{F}$  NMR (470.6 MHz,  $(\text{CD}_3)_2\text{CO}$ ):  $\delta = -116.1$  ppm (m, 1F).  $^{13}\text{C}\{^1\text{H}\}$  NMR (125.8 MHz,  $(\text{CD}_3)_2\text{CO}$ ):  $\delta = 163.4$  (d, 1C,  $^1J(^{19}\text{F}, ^{13}\text{C}) = 244$  Hz, C3), 144.1 (q, 1C,  $^1J(^{13}\text{C}, ^{11}\text{B}) \approx 56$  Hz, C1), 130.2 (d, 1C,  $^3J(^{19}\text{F}, ^{13}\text{C}) = 7.4$  Hz, C5), 129.1 (d, 1C,  $^4J(^{19}\text{F}, ^{13}\text{C}) = 2.7$  Hz, C6), 129.1 (q, 3C,  $^1J(^{13}\text{C}, ^{11}\text{B}) \approx 64$  Hz, CN), 119.3 (d, 1C,  $^2J(^{19}\text{F}, ^{13}\text{C}) = 19.3$  Hz, C2), 113.9 ppm (d, 1C,  $^2J(^{19}\text{F}, ^{13}\text{C}) = 21.1$  Hz, C4).  $^{13}\text{C}\{^{19}\text{F}\}$  NMR (125.8 MHz,  $(\text{CD}_3)_2\text{CO}$ ):  $\delta = 163.4$  (s, 1C, C3), 144.1 (q, 1C,  $^1J(^{13}\text{C}, ^{11}\text{B}) \approx 56$  Hz, C1), 130.2 (d, 1C,  $^1J(^{13}\text{C}, ^1\text{H}) = 161$  Hz, C5), 129.1 (ddd, 1C,  $^1J(^{13}\text{C}, ^1\text{H}) = 159$  Hz,  $^3J(^{13}\text{C}, ^1\text{H}) = 7.7$  Hz ( $2\times$ ), C6), 129.1 (q, 3C,  $^1J(^{13}\text{C}, ^{11}\text{B}) \approx 64$  Hz, CN), 119.3 (dm, 1C,  $^1J(^{13}\text{C}, ^1\text{H}) = 159$  Hz, C2), 113.9 ppm (dm, 1C,  $^1J(^{13}\text{C}, ^1\text{H}) = 162$  Hz, C4). Elemental analysis: calculated (%) for  $\text{C}_9\text{H}_4\text{BFKN}_3$ , C 48.46, H 1.81, N 18.84; found, C 47.90, H 1.73, N 18.51. (–)-ESI-MS,  $m/z$ ,  $[(\text{C}_6\text{FH}_4)\text{B}(\text{CN})_3]^-$ : calculated 184.05 (100.0%), 183.05 (24.8%), 185.05 (9.7%); found 184.05 (100.0%), 183.05 (24.9%), 185.05 (9.4%). Crystals of **KB2b** suitable for an X-ray diffraction study were obtained from an *isopropanol* solution by slow evaporation of the solvent.

**K[1-{(NC)<sub>3</sub>B}-4-F-C<sub>6</sub>H<sub>4</sub>] (KB2c):** Method B was employed for the preparation of **KB2c**,

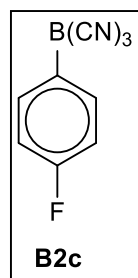

using 1,4-difluorobenzene (0.4 mL, 3.9 mmol), **K<sub>2</sub>1** (300 mg, 1.80 mmol) and LiCl (115 mg, 2.71 mmol). The reaction mixture was stirred at 75 °C for 30 hrs. Yield: 180 mg (0.807 mmol, 45%). The product is a mixture of **KB2c** and **KB2b** (ratio 7:3) and additionally contained 11% K[BH(CN)<sub>3</sub>]. The NMR spectroscopic data for **KB2b** match with those given above. NMR data of **KB2c**: <sup>11</sup>B NMR (160.5 MHz, (CD<sub>3</sub>)<sub>2</sub>CO): δ = -29.1 ppm (s, 1B). <sup>1</sup>H NMR (500.1 MHz, (CD<sub>3</sub>)<sub>2</sub>CO): δ = 7.50 (dd, br, 2H, <sup>3</sup>J(<sup>1</sup>H,<sup>1</sup>H) ≈ 8.6 Hz, <sup>4</sup>J(<sup>19</sup>F,<sup>1</sup>H) ≈ 6.1 Hz, H2/6), 7.01 ppm (ddd, 2H, <sup>3</sup>J(<sup>19</sup>F,<sup>1</sup>H) = 9.5 Hz, <sup>3</sup>J(<sup>1</sup>H,<sup>1</sup>H) = 8.6 Hz, H3/5). <sup>19</sup>F NMR (470.6 MHz, (CD<sub>3</sub>)<sub>2</sub>CO): δ = -118.6 ppm (tt, 1F, <sup>3</sup>J(<sup>19</sup>F,<sup>1</sup>H) = 9.4 Hz, <sup>4</sup>J(<sup>19</sup>F,<sup>1</sup>H) = 6.1 Hz). <sup>13</sup>C{<sup>1</sup>H} NMR (125.8 MHz, (CD<sub>3</sub>)<sub>2</sub>CO): δ = 162.9 (d, 1C, <sup>1</sup>J(<sup>19</sup>F,<sup>13</sup>C) = 243 Hz, C4), 136.5 (q, 1C, <sup>1</sup>J(<sup>13</sup>C,<sup>11</sup>B) ≈ 56 Hz, C1), 135.0 (d, 2C, <sup>3</sup>J(<sup>19</sup>F,<sup>13</sup>C) = 7.4 Hz, C2/6), 129.5 (q, 3C, <sup>1</sup>J(<sup>13</sup>C,<sup>11</sup>B) ≈ 64 Hz, CN), 115.0 ppm (d, 2C, <sup>2</sup>J(<sup>19</sup>F,<sup>13</sup>C) = 20.0 Hz, C3/5). <sup>13</sup>C{<sup>19</sup>F} NMR (125.8 MHz, (CD<sub>3</sub>)<sub>2</sub>CO): δ = 162.9 (tt, 1C, <sup>2</sup>J(<sup>13</sup>C,<sup>1</sup>H) = 10.9 Hz, <sup>3</sup>J(<sup>13</sup>C,<sup>1</sup>H) = 4.7 Hz, C4), 136.5 (m, 1C, C1), 135.0 (dd, 2C, <sup>1</sup>J(<sup>13</sup>C,<sup>1</sup>H) = 159 Hz, <sup>n</sup>J(<sup>13</sup>C,<sup>1</sup>H) = 8.9 Hz, C2/6), 129.5 (q, 3C, <sup>1</sup>J(<sup>13</sup>C,<sup>11</sup>B) ≈ 64 Hz, CN), 115.0 ppm (d, 2C, <sup>1</sup>J(<sup>13</sup>C,<sup>1</sup>H) = 162 Hz, C3/5). (-)-ESI-MS, m/z, [(C<sub>6</sub>FH<sub>4</sub>)B(CN)<sub>3</sub>]<sup>-</sup>: calculated 184.05 (100.0%), 183.05 (24.8%), 185.05 (9.7%); found 184.05 (100.0%), 183.05 (25.2%), 185.05 (9.4%).

**K[1-{(NC)<sub>3</sub>B}-2,3-F<sub>2</sub>-C<sub>6</sub>H<sub>3</sub>] (KB3a):** Method B was employed for the preparation of **KB3a**,

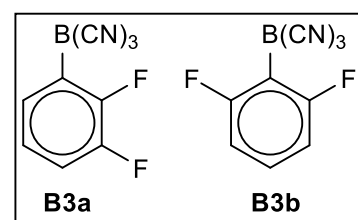

using 1,2,3-trifluorobenzene (0.4 mL, 3.9 mmol), **K<sub>2</sub>1** (300 mg, 1.80 mmol) and LiCl (115 mg, 2.71 mmol). The reaction mixture was stirred at room temperature for 3 days. Yield: 285 mg (1.18 mmol, 66%). The product is a mixture of **KB3a** and

**K[1-{(NC)<sub>3</sub>B}-2,6-F<sub>2</sub>-C<sub>6</sub>H<sub>3</sub>] (KB3b)** (ratio 4:1). NMR spectroscopic data of the main product **KB3a**: <sup>11</sup>B NMR (160.5 MHz, (CD<sub>3</sub>)<sub>2</sub>CO): δ = -31.0 ppm (s, br, 1B). <sup>11</sup>B{<sup>1</sup>H} NMR (160.5 MHz, (CD<sub>3</sub>)<sub>2</sub>CO): δ = -31.0 ppm (dd, 1B, <sup>3</sup>J(<sup>19</sup>F,<sup>11</sup>B) = 8.4 Hz, <sup>4</sup>J(<sup>19</sup>F,<sup>11</sup>B) = 3.5 Hz). <sup>1</sup>H NMR (500.1 MHz, (CD<sub>3</sub>)<sub>2</sub>CO): δ = 7.34–7.27 (m, br, 1H, H6), 7.20–7.06 ppm (m, 2H, H4/5). <sup>19</sup>F NMR (470.6 MHz, (CD<sub>3</sub>)<sub>2</sub>CO): δ = -132.5 (m, 1F, F2), -142.3 ppm (m, 1F, F3). <sup>13</sup>C{<sup>1</sup>H} NMR (125.8 MHz, (CD<sub>3</sub>)<sub>2</sub>CO): δ = 153.5 (dd, 1C, <sup>1</sup>J(<sup>19</sup>F,<sup>13</sup>C) = 244 Hz, <sup>2</sup>J(<sup>19</sup>F,<sup>13</sup>C) = 11.3 Hz, C2), 151.1 (dd, br, 1C, <sup>1</sup>J(<sup>19</sup>F,<sup>13</sup>C) = 246 Hz, <sup>2</sup>J(<sup>19</sup>F,<sup>13</sup>C) = 14.9 Hz, C3), 130.2 (dd, 1C, <sup>1</sup>J(<sup>19</sup>F,<sup>13</sup>C) = 7.6 Hz, 3.6 Hz, C6), 129.8 (qd, 1C, overlapped, C1), 128.1 (q, 3C, <sup>1</sup>J(<sup>13</sup>C,<sup>11</sup>B) ≈ 66 Hz, CN), 125.0 (s, br, 1C, C5), 116.9 ppm (d, 1C, <sup>2</sup>J(<sup>19</sup>F,<sup>13</sup>C) = 17.2 Hz, C4). <sup>13</sup>C{<sup>19</sup>F}

NMR (125.8 MHz, (CD<sub>3</sub>)<sub>2</sub>CO):  $\delta$  = 153.5 (dd, 1C,  $^3J(^{13}\text{C}, ^1\text{H}) = 11.9$  Hz, 7.2 Hz, C2), 151.1 (s, br, 1C, C3), 130.2 (dd, 1C,  $^1J(^{13}\text{C}, ^1\text{H}) = 162$  Hz,  $^2J(^{13}\text{C}, ^1\text{H}) \approx 9$  Hz, C6), 129.8 (q, 1C, overlapped, C1), 128.1 (q, 3C,  $^1J(^{13}\text{C}, ^{11}\text{B}) \approx 66$  Hz, CN), 125.0 (d, 1C,  $^1J(^{13}\text{C}, ^1\text{H}) = 163$  Hz, C5), 116.9 ppm (dd, 1C,  $^1J(^{13}\text{C}, ^1\text{H}) = 164$  Hz,  $^2J(^{13}\text{C}, ^1\text{H}) \approx 9.5$  Hz, C4). NMR spectroscopic data of the side product **KB3b**:  $^{11}\text{B}$  NMR (160.5 MHz, (CD<sub>3</sub>)<sub>2</sub>CO):  $\delta$  = -33.6 ppm (t, 1B  $^3J(^{19}\text{F}, ^{11}\text{B}) = 7.8$  Hz).  $^1\text{H}$  NMR (500.1 MHz, (CD<sub>3</sub>)<sub>2</sub>CO):  $\delta$  = 7.31–7.25 (m, 1H, H4), 6.86–6.80 ppm (m, 2H, H3/5).  $^{19}\text{F}$  NMR (470.6 MHz, (CD<sub>3</sub>)<sub>2</sub>CO):  $\delta$  = -101.4 ppm (m, 2F, F2/6).  $^{13}\text{C}\{^1\text{H}\}$  NMR (125.8 MHz, (CD<sub>3</sub>)<sub>2</sub>CO):  $\delta$  = 166.1 (dd, 2C,  $^1J(^{19}\text{F}, ^{13}\text{C}) = 246$  Hz,  $^2J(^{19}\text{F}, ^{13}\text{C}) = 13.0$  Hz, C2/6), 130.5 (t, 1C,  $^3J(^{19}\text{F}, ^{13}\text{C}) = 10.8$  Hz, C4), 128.2 (q, 3C,  $^1J(^{13}\text{C}, ^{11}\text{B}) \approx 66$  Hz, CN), 111.6 ppm (m, 2C, C3/5) [the signal of the C1 atom was not identified].  $^{13}\text{C}\{^{19}\text{F}\}$  NMR (125.8 MHz, (CD<sub>3</sub>)<sub>2</sub>CO):  $\delta$  = 166.1 (d, 2C,  $^2J(^{13}\text{C}, ^1\text{H}) = 12.6$  Hz, C2/6), 130.5 (d, 1C,  $^1J(^{13}\text{C}, ^1\text{H}) = 164$  Hz, C4), 128.2 (q, 3C,  $^1J(^{13}\text{C}, ^{11}\text{B}) \approx 66$  Hz, CN), 111.6 (dd, 2C,  $^1J(^{13}\text{C}, ^1\text{H}) = 164$  Hz,  $^2J(^{13}\text{C}, ^1\text{H}) = 7.8$  Hz, C3/5) [the signal of the C1 atom was not identified]. Elemental analysis: calculated (%) for C<sub>9</sub>H<sub>3</sub>BF<sub>2</sub>KN<sub>3</sub>, C 44.85, H 1.25, N 17.43; found, C 44.89, H 1.22, N 17.42. (-)-ESI-MS, m/z, [(C<sub>6</sub>F<sub>2</sub>H<sub>3</sub>)B(CN)<sub>3</sub>]<sup>-</sup>: calculated 202.04 (100.0%), 201.04 (24.8%), 203.04 (9.7%); found 202.04 (100.0%), 201.04 (24.5%), 203.04 (9.8%). Further purification of **KB3a** was achieved by crystallization from a solution in ethyl acetate by slow evaporation of the solvent. The single crystals obtained, were suitable for an X-ray diffraction study.

**K[1-{(NC)<sub>3</sub>B}-2,5-F<sub>2</sub>-C<sub>6</sub>H<sub>3</sub>] (KB3c)**: Method B was employed for the preparation of **KB3c**,

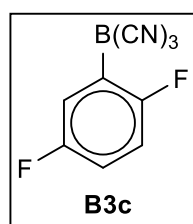

using 1,2,4-trifluorobenzene (0.4 mL, 3.8 mmol), **K<sub>2</sub>1** (300 mg, 1.80 mmol) and LiCl (115 mg, 2.71 mmol). The reaction mixture was stirred at room temperature for 2 hrs. Yield: 330 mg (1.37 mmol, 76%).  $^{11}\text{B}$  NMR (160.5 MHz, (CD<sub>3</sub>)<sub>2</sub>CO):  $\delta$  = -31.0 ppm (s, 1B).  $^1\text{H}$  NMR (500.1 MHz, (CD<sub>3</sub>)<sub>2</sub>CO):  $\delta$  = 7.20 (d, br, 1H, H6), 7.04–6.98 ppm (m, 2H, H3/4).  $^1\text{H}\{^{11}\text{B}\}$  NMR (500.1 MHz, (CD<sub>3</sub>)<sub>2</sub>CO):  $\delta$  = 7.22–7.18 (m, 1H, H6), 7.04–6.98 ppm (m, 2H, H3/4).  $^{19}\text{F}$  NMR (470.6 MHz, (CD<sub>3</sub>)<sub>2</sub>CO):  $\delta$  = -111.7 (s, br, 1F, F2), -122.1 (m, 1F, F5).  $^{13}\text{C}\{^1\text{H}\}$  NMR (125.8 MHz, (CD<sub>3</sub>)<sub>2</sub>CO):  $\delta$  = 162.1 (dd, 1C,  $^1J(^{19}\text{F}, ^{13}\text{C}) = 239$  Hz,  $^4J(^{19}\text{F}, ^{13}\text{C}) = 1.9$  Hz, C2), 159.4 (d, br, 1C,  $^1J(^{19}\text{F}, ^{13}\text{C}) = 240$  Hz, C5), 128.8 (qd, 1C,  $^1J(^{13}\text{C}, ^{11}\text{B}) \approx 56$  Hz,  $^2J(^{19}\text{F}, ^{13}\text{C}) \approx 25$  Hz, C1), 128.0 (q, 3C,  $^1J(^{13}\text{C}, ^{11}\text{B}) = 66$  Hz, CN), 120.9 (dd, 1C,  $^2J(^{19}\text{F}, ^{13}\text{C}) = 23.0$  Hz,  $^3J(^{19}\text{F}, ^{13}\text{C}) = 9.5$  Hz, C6), 116.6 (dd, 1C,  $^2J(^{19}\text{F}, ^{13}\text{C}) = 27.7$  Hz,  $^3J(^{19}\text{F}, ^{13}\text{C}) = 8.3$  Hz, C3), 115.9 ppm (dd, 1C,  $^2J(^{19}\text{F}, ^{13}\text{C}) = 24.4$  Hz,  $^3J(^{19}\text{F}, ^{13}\text{C}) = 9.1$  Hz, C4).  $^{13}\text{C}\{^{19}\text{F}\}$  NMR (125.8 MHz, (CD<sub>3</sub>)<sub>2</sub>CO):  $\delta$  = 162.3–162.0 (m, 1C, C2), 159.4 (s, br, 1C, C5), 128.8 (q, 1C,  $^1J(^{13}\text{C}, ^{11}\text{B}) \approx 57$  Hz, C1), 128.0



(q, 3C,  $^1J(^{13}\text{C}, ^{11}\text{B}) = 66$  Hz, CN), 120.9 (d, 1C,  $^1J(^{13}\text{C}, ^1\text{H}) = 162$  Hz, C6), 116.6 (d, 1C,  $^1J(^{13}\text{C}, ^1\text{H}) = 165$  Hz, C3), 115.9 ppm (dd, 1C,  $^1J(^{13}\text{C}, ^1\text{H}) = 166$  Hz,  $^3J(^{13}\text{C}, ^1\text{H}) \approx 5$  Hz, C4). Elemental analysis: calculated (%) for  $\text{C}_9\text{H}_3\text{BF}_2\text{KN}_3$ , C 44.85, H 1.25, N 17.43; found, C 44.15, H 1.27, N 16.52. (-)-ESI-MS, m/z,  $[(\text{C}_6\text{F}_2\text{H}_3)\text{B}(\text{CN})_3]^-$ : calculated 202.04 (100.0%), 201.04 (24.8%), 203.04 (9.7%); found 202.04 (100.0%), 201.04 (25.3%), 203.04 (9.5%). Crystals of **KB3c** suitable for an X-ray diffraction study were obtained from an aqueous solution by slow evaporation of the solvent.

**K[1- $\{(\text{NC})_3\text{B}\}$ -3,5- $\text{F}_2$ - $\text{C}_6\text{H}_3$ ] (KB3d):** Method B was employed for the preparation of **KB3d**,

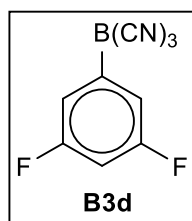

using 1,3,5-trifluorobenzene (0.3 mL, 2.9 mmol), **K21** (300 mg, 1.80 mmol) and LiCl (115 mg, 2.71 mmol). The reaction mixture was stirred at room temperature overnight. Yield: 275 mg (1.14 mmol, 63%).  $^{11}\text{B}$  NMR (160.5 MHz,  $(\text{CD}_3)_2\text{CO}$ ):  $\delta = -29.3$  ppm (s, 1B).  $^1\text{H}$  NMR (500.1 MHz,  $(\text{CD}_3)_2\text{CO}$ ):  $\delta = 7.04$  (m, 2H, H2/6), 6.81 ppm (tt, 1H,  $^3J(^{19}\text{F}, ^1\text{H}) = 9.3$  Hz,  $^4J(^1\text{H}, ^1\text{H}) = 2.4$  Hz, H4).  $^{19}\text{F}$  NMR (470.6 MHz,  $(\text{CD}_3)_2\text{CO}$ ):  $\delta = -112.7$  ppm (m, 2F).  $^{13}\text{C}\{^1\text{H}\}$  NMR (125.8 MHz,  $(\text{CD}_3)_2\text{CO}$ ):  $\delta = 163.6$  (d, 2C,  $^1J(^{19}\text{F}, ^{13}\text{C}) = 248$  Hz, C3/5), 146.4 (q, 1C,  $^1J(^{13}\text{C}, ^{11}\text{B}) = 56$  Hz, C1), 128.6 (q, 3C,  $^1J(^{13}\text{C}, ^{11}\text{B}) = 65$  Hz, CN), 115.4 (m, 2C, C2/6), 102.4 (t, 1C,  $^2J(^{19}\text{F}, ^{13}\text{C}) = 25.6$  Hz, C4).  $^{13}\text{C}\{^{19}\text{F}\}$  NMR (125.8 MHz,  $(\text{CD}_3)_2\text{CO}$ ):  $\delta = 163.6$  (s, 2C, C3/5), 146.4 (q, 1C,  $^1J(^{13}\text{C}, ^{11}\text{B}) = 56$  Hz, C1), 128.6 (q, 3C,  $^1J(^{13}\text{C}, ^{11}\text{B}) = 65$  Hz, CN), 115.4 (dq, 2C,  $^1J(^{13}\text{C}, ^1\text{H}) = 163$  Hz,  $^2J(^{13}\text{C}, ^{11}\text{B}) \approx 4$  Hz, C2/6), 102.4 (dt, 1C,  $^1J(^{13}\text{C}, ^1\text{H}) = 166$  Hz,  $^3J(^{13}\text{C}, ^1\text{H}) = 4.5$  Hz, C4).  $^{13}\text{C}\{^{13}\text{B}, ^1\text{H}\}$  NMR (75.5 Hz,  $(\text{CD}_3)_2\text{CO}$ ):  $\delta = 163.6$  (dd, 2C,  $^1J(^{19}\text{F}, ^{13}\text{C}) = 248$  Hz,  $^3J(^{19}\text{F}, ^{13}\text{C}) = 11.6$  Hz, C3/5), 146.4 (t, 1C,  $^3J(^{19}\text{F}, ^{13}\text{C}) = 6.2$  Hz, C1), 128.6 (s, 3C, CN), 115.4 (m, 2C, C2/6), 102.4 (t, 1C,  $^2J(^{19}\text{F}, ^{13}\text{C}) = 25.6$  Hz, C4). Elemental analysis: calculated (%) for  $\text{C}_9\text{H}_3\text{BF}_2\text{KN}_3$ , C 44.85, H 1.25, N 17.43; found, C 45.09, H 1.12, N 17.51. (-)-ESI-MS, m/z,  $[(\text{C}_6\text{F}_2\text{H}_3)\text{B}(\text{CN})_3]^-$ : calculated 202.04 (100.0%), 201.04 (24.8%), 203.04 (9.7%); found 202.04 (100.0%), 201.04 (24.6%), 203.04 (9.5%). Crystals of **KB3d** suitable for an X-ray diffraction study were obtained from an acetone solution by slow evaporation of the solvent.

**K[1- $\{(\text{NC})_3\text{B}\}$ -2,3,6- $\text{F}_3$ - $\text{C}_6\text{H}_2$ ] (KB4a):** Method B was employed for the preparation of

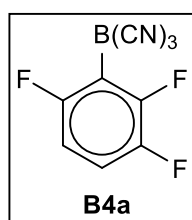

**KB4a**, using 1,2,3,4-tetrafluorobenzene (0.3 mL, 2.8 mmol), **K21** (225 mg, 1.35 mmol) and LiCl (85 mg, 2.01 mmol). The reaction mixture was stirred at room temperature for several minutes. Yield: 270 mg (1.04 mmol, 77%).  $^{11}\text{B}$  NMR (160.5 MHz,  $(\text{CD}_3)_2\text{CO}$ ):  $\delta = -33.7$  ppm (dd, 1B,  $^3J(^{19}\text{F}, ^{11}\text{B}) \approx 8$  Hz (2 $\times$ )).  $^1\text{H}$  NMR (500.1 MHz,  $(\text{CD}_3)_2\text{CO}$ ):  $\delta = 7.21$  (dddd, 1H,  $^3J(^1\text{H}, ^1\text{H}) = 9.1$  Hz,

$^{3/4}J(^{19}\text{F}, ^1\text{H}) = 9.9 \text{ Hz}, 9.1 \text{ Hz}, 5.0 \text{ Hz}, \text{H4}), 6.85 \text{ ppm (m, 1H, H5)}$ .  $^1\text{H}\{^{11}\text{B}\}$  NMR (500.1 MHz,  $(\text{CD}_3)_2\text{CO}$ ):  $\delta = 6.85 \text{ ppm (dddd, 1H, } ^3J(^1\text{H}, ^1\text{H}) = 9.1 \text{ Hz, } ^{3/4/5}J(^{19}\text{F}, ^1\text{H}) = 9.1 \text{ Hz}, 8.8 \text{ Hz}, 3.6 \text{ Hz}, 2.2 \text{ Hz, H5)}$  [other signal as stated for the  $^1\text{H}$  NMR spectrum].  $^{19}\text{F}$  NMR (470.6 MHz,  $(\text{CD}_3)_2\text{CO}$ ):  $\delta = -106.8 \text{ (s, br, 1F, F6), -127.1 (s, br, 1F, F2), -145.6 ppm (m, 1F, F3)}$ .  $^{13}\text{C}\{^1\text{H}\}$  NMR (125.8 MHz,  $(\text{CD}_3)_2\text{CO}$ ):  $\delta = 160.8 \text{ (ddd, 1C, } ^1J(^{19}\text{F}, ^{13}\text{C}) = 243 \text{ Hz, } ^3J(^{19}\text{F}, ^{13}\text{C}) = 10.6 \text{ Hz, } ^4J(^{19}\text{F}, ^{13}\text{C}) = 2.3 \text{ Hz, C6), 152.6 (ddd, 1C, } ^1J(^{19}\text{F}, ^{13}\text{C}) = 247 \text{ Hz, } ^{2/3}J(^{19}\text{F}, ^{13}\text{C}) = 13.4 \text{ Hz (2}\times\text{), C2), 147.9 (dd, br, 1C, } ^1J(^{19}\text{F}, ^{13}\text{C}) = 242 \text{ Hz, } ^2J(^{19}\text{F}, ^{13}\text{C}) \approx 15 \text{ Hz, C3), 127.5 (q, 3C, } ^1J(^{13}\text{C}, ^{11}\text{B}) = 67 \text{ Hz, CN), 117.2 (ddd, 1C, } ^2J(^{19}\text{F}, ^{13}\text{C}) = 19.6 \text{ Hz, } ^3J(^{19}\text{F}, ^{13}\text{C}) = 10.8 \text{ Hz, } ^4J(^{19}\text{F}, ^{13}\text{C}) = 1.6 \text{ Hz, C4), 116.4 (m, 1C, C1), 111.5 ppm (ddd, br, 1C, } ^3J(^{19}\text{F}, ^{13}\text{C}) = 28.2 \text{ Hz, 6.3 Hz, } ^4J(^{19}\text{F}, ^{13}\text{C}) = 4.0 \text{ Hz, C5)}$ .  $^{13}\text{C}\{^{13}\text{B}, ^1\text{H}\}$  NMR (75.5 Hz,  $(\text{CD}_3)_2\text{CO}$ ):  $\delta = 147.9 \text{ (ddd, 1C, } ^1J(^{19}\text{F}, ^{13}\text{C}) = 242 \text{ Hz, } ^2J(^{19}\text{F}, ^{13}\text{C}) = 15.5 \text{ Hz, } ^4J(^{19}\text{F}, ^{13}\text{C}) = 3.7 \text{ Hz, C3), 127.5 (dd, 3C, } ^4J(^{19}\text{F}, ^{13}\text{C}) = 1.4 \text{ Hz (2}\times\text{), CN), 116.4 (ddd, } ^2J(^{19}\text{F}, ^{13}\text{C}) = 28.0 \text{ Hz, 21.6 Hz, } ^3J(^{19}\text{F}, ^{13}\text{C}) = 1.6 \text{ Hz, C1)}$  [other signals as stated for the  $^{13}\text{C}\{^1\text{H}\}$  NMR spectrum]. Elemental analysis: calculated (%) for  $\text{C}_9\text{H}_2\text{BF}_3\text{KN}_3$ , C 41.73, H 0.78, N 16.22; found, C 41.80, H 0.84, N 16.08. (–)-ESI-MS,  $m/z$ ,  $[(\text{C}_6\text{F}_3\text{H}_2)\text{B}(\text{CN})_3]^-$ : calculated 220.03 (100.0%), 219.03 (24.8%), 221.03 (9.7%); found 220.03 (100.0%), 219.03 (24.0%), 221.03 (9.5%). Crystals of **KB4a** suitable for an X-ray diffraction study were obtained from an acetone/water solution by slow evaporation of acetone.

**K[1-{(NC)<sub>3</sub>B}-2,3,5-F<sub>3</sub>-C<sub>6</sub>H<sub>2</sub>] (KB4b): 1. Entry:** Method B was employed for the

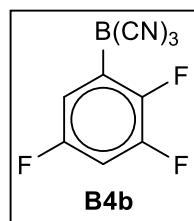

preparation of **KB4b**, using 1,2,3,5-tetrafluorobenzene (0.4 mL, 2.8 mmol), **K<sub>2</sub>1** (200 mg, 1.20 mmol) and LiCl (80.0 mg, 1.89 mmol). The reaction mixture was stirred at room temperature for 2 hrs. Yield: 195 mg (0.753 mmol, 63%). **2. Entry:** Method B was employed for the preparation of **KB4b**, using 1,2,3,5-tetrafluorobenzene (ca. 0.4 mL, 3.7 mmol) and **K<sub>2</sub>1** (300 mg, 1.80 mmol) but without addition of LiCl. The reaction mixture was stirred at room temperature for 3 days and then at 75 °C for 30 hrs. Yield: 240 mg (0.926 mmol, 51%). The product contained 8% of other isomers.  $^{11}\text{B}$  NMR (160.5 MHz,  $(\text{CD}_3)_2\text{CO}$ ):  $\delta = -31.2 \text{ ppm (s, 1B)}$ .  $^1\text{H}$  NMR (500.1 MHz,  $(\text{CD}_3)_2\text{CO}$ ):  $\delta = 7.10\text{--}7.04 \text{ (m, 1H, H4), 7.05\text{--}6.99 \text{ ppm (m, br, 1H, H6)}$ .  $^{19}\text{F}$  NMR (470.6 MHz,  $(\text{CD}_3)_2\text{CO}$ ):  $\delta = -117.8 \text{ (m, 1F, F5), -136.7 (m, 1F, F3), -137.2 ppm (m, 1F, F2)}$ .  $^{13}\text{C}\{^1\text{H}\}$  NMR (125.8 MHz,  $(\text{CD}_3)_2\text{CO}$ ):  $\delta = 158.3 \text{ (dm, 1C, } ^1J(^{19}\text{F}, ^{13}\text{C}) = 244 \text{ Hz, C5), 150.6 (dm, 1C, } ^1J(^{19}\text{F}, ^{13}\text{C}) = 248 \text{ Hz, C3), 149.7 (ddd, 1C, } ^1J(^{19}\text{F}, ^{13}\text{C}) = 239 \text{ Hz, } ^2J(^{19}\text{F}, ^{13}\text{C}) = 10.6 \text{ Hz, } ^4J(^{19}\text{F}, ^{13}\text{C}) = 3.4 \text{ Hz, C2), 131.0 (qd, 1C, } ^1J(^{13}\text{C}, ^{11}\text{B}) = 55 \text{ Hz, } ^2J(^{19}\text{F}, ^{13}\text{C}) \approx 22 \text{ Hz, C1), 127.5 (q, 3C, } ^1J(^{13}\text{C}, ^{11}\text{B}) = 66 \text{ Hz, CN), 115.6 (ddd, 1C, } ^2J(^{19}\text{F}, ^{13}\text{C}) = 22.4 \text{ Hz, } ^3J(^{19}\text{F}, ^{13}\text{C})$

= 7.5 Hz,  $^4J(^{19}\text{F}, ^{13}\text{C}) = 3.5$  Hz, C6), 105.0 ppm (ddd, 1C,  $^2J(^{19}\text{F}, ^{13}\text{C}) = 28.0$  Hz, 21.4 Hz, C4).  $^{13}\text{C}\{^{13}\text{B}, ^1\text{H}\}$  NMR (75.5 Hz,  $(\text{CD}_3)_2\text{CO}$ ):  $\delta = 158.3$  (ddd,  $^1J(^{19}\text{F}, ^{13}\text{C}) = 244$  Hz,  $^3J(^{19}\text{F}, ^{13}\text{C}) = 9.4$  Hz,  $^4J(^{19}\text{F}, ^{13}\text{C}) = 2.5$  Hz, C5), 150.6 (m, 1C, C3), 149.7 (m, 1C, C2), 131.1 (dd, 1C,  $^2J(^{19}\text{F}, ^{13}\text{C}) = 21.7$  Hz,  $^3J(^{19}\text{F}, ^{13}\text{C}) = 6.2$  Hz, C1), 127.5 ppm (s, 3C, CN) [Signals for C4 and C6 as stated for the  $^{13}\text{C}\{^1\text{H}\}$  NMR spectrum]. Elemental analysis: calculated (%) for  $\text{C}_9\text{H}_2\text{BF}_3\text{KN}_3$ , C 41.73, H 0.78, N 16.22; found, C 41.41, H 0.91, N 15.28. (–)-ESI-MS,  $m/z$ ,  $[(\text{C}_6\text{F}_3\text{H}_2)\text{B}(\text{CN})_3]^-$ : calculated 220.03 (100.0%), 219.03 (24.8%), 221.03 (9.7%); found 220.03 (100.0%), 219.03 (24.9%), 221.03 (9.4%). Crystals of **KB4b** suitable for an X-ray diffraction study were obtained from an acetone/water solution by slow evaporation of acetone.

**K[1-{(NC)<sub>3</sub>B}-2,4,5-F<sub>3</sub>-C<sub>6</sub>H<sub>2</sub>] (KB4c) and [Me<sub>3</sub>NH][1-{(NC)<sub>3</sub>B}-2,4,5-F<sub>3</sub>-C<sub>6</sub>H<sub>2</sub>] ([Me<sub>3</sub>NH]-**

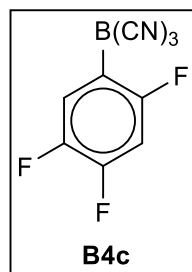

**B4c): 1. Entry:** Method B was employed for the preparation of **KB4c**, using 1,2,4,5-tetrafluorobenzene (0.3 mL, 2.7 mmol), **K<sub>2</sub>1** (200 mg, 1.20 mmol) and LiCl (80.0 mg, 1.89 mmol). The reaction mixture was stirred at room temperature for 30 min. Yield: 155 mg (0.598 mmol, 50%). **2. Entry:** **[Me<sub>3</sub>NH]B4c:** Method B (modified) was employed for the preparation of

**[Me<sub>3</sub>NH]B4c**, using 1,2,4,5-tetrafluorobenzene (0.6 mL, 5.4 mmol), **K<sub>2</sub>1** (310 mg, 1.86 mmol) and LiCl (120 mg, 2.83 mmol). The reaction mixture was stirred at room temperature for 2 hrs. The product was precipitated with slightly acidified aqueous solution of excess **[Me<sub>3</sub>NH]Cl**, filtrated and dried in a vacuum. Yield: 260 mg (0.928 mmol, 50%). NMR spectroscopic data for **KB4c**:  $^{11}\text{B}$  NMR (160.5 MHz,  $(\text{CD}_3)_2\text{CO}$ ):  $\delta = -31.2$  ppm (s, 1B).  $^1\text{H}$  NMR (500.1 MHz,  $(\text{CD}_3)_2\text{CO}$ ):  $\delta = 7.31$  (m, br, 1H, H6), 7.05 ppm (ddd, 1H,  $^{3/4}J(^{19}\text{F}, ^1\text{H}) = 10.8$  Hz, 8.6 Hz, 6.3 Hz, H3).  $^1\text{H}\{^{11}\text{B}\}$  NMR (500.1 MHz,  $(\text{CD}_3)_2\text{CO}$ ):  $\delta = 7.31$  (ddd, 1H,  $^{3/4}J(^{19}\text{F}, ^1\text{H}) = 11.0$  Hz, 9.6 Hz, 5.8 Hz, H6) [signal for H3 as stated for the  $^1\text{H}$  NMR spectrum].  $^{19}\text{F}$  NMR (470.6 MHz,  $(\text{CD}_3)_2\text{CO}$ ):  $\delta = -106.7$  (s, br, 1F, F2),  $-137.8$  (m, 1F, F4),  $-146.5$  ppm (m, 1F, F5).  $^{13}\text{C}\{^1\text{H}\}$  NMR (125.8 MHz,  $(\text{CD}_3)_2\text{CO}$ ):  $\delta = 160.9$  (ddd, 1C,  $^1J(^{19}\text{F}, ^{13}\text{C}) = 243$  Hz,  $^3J(^{19}\text{F}, ^{13}\text{C}) = 9.4$  Hz,  $^4J(^{19}\text{F}, ^{13}\text{C}) = 2.2$  Hz, C2), 150.1 (ddd, 1C,  $^1J(^{19}\text{F}, ^{13}\text{C}) = 248$  Hz,  $^2J(^{19}\text{F}, ^{13}\text{C}) = 14.5$  Hz,  $^3J(^{19}\text{F}, ^{13}\text{C}) = 13.1$  Hz, C4), 147.2 (dm, br, 1C,  $^1J(^{19}\text{F}, ^{13}\text{C}) = 242$  Hz, C5), 127.8 (qd, 3C,  $^1J(^{13}\text{C}, ^{11}\text{B}) = 66$  Hz,  $^4J(^{19}\text{F}, ^{13}\text{C}) \approx 11$  Hz, CN), 123.4 (qd, 1C,  $^1J(^{13}\text{C}, ^{11}\text{B}) \approx 56$  Hz,  $^2J(^{19}\text{F}, ^{13}\text{C}) = 27$  Hz, C1), 122.1 (dd, 1C,  $^{2/3}J(^{19}\text{F}, ^{13}\text{C}) = 18.1$  Hz, 10.9 Hz, C6), 105.6 ppm (dd, 1C,  $^{2/3}J(^{19}\text{F}, ^{13}\text{C}) = 31.2$  Hz, 20.3 Hz, C3).  $^{13}\text{C}\{^{19}\text{F}\}$  NMR (125.8 MHz,  $(\text{CD}_3)_2\text{CO}$ ):  $\delta = 160.9$  (dd, 1C,  $^{2/3}J(^{13}\text{C}, ^1\text{H}) = 13.8$  Hz, 6.3 Hz, C2), 150.1 (dd, 1C,  $^{2/3}J(^{13}\text{C}, ^1\text{H}) = 9.3$  Hz, 6.5 Hz, C4), 147.1 (s, br, 1C, C5), 127.1 (q, 3C,  $^1J(^{13}\text{C}, ^{11}\text{B}) = 66$  Hz,

CN), 123.4 (q, 1C,  $^1J(^{13}\text{C}, ^{11}\text{B}) \approx 56$  Hz, C1), 122.1 (d, 1C,  $^1J(^{13}\text{C}, ^1\text{H}) = 164$  Hz, C6), 105.6 ppm (d, 1C,  $^1J(^{13}\text{C}, ^1\text{H}) = 166$  Hz, C3). Elemental analysis: calculated (%) for  $\text{C}_{12}\text{H}_{12}\text{BF}_3\text{N}_4$ , C 51.46, H 4.32, N 20.01; found, C 51.59, H 4.04, N 20.54. (–)-ESI-MS,  $m/z$ ,  $[(\text{C}_6\text{F}_3\text{H}_2)\text{B}(\text{CN})_3]^-$ : calculated 220.03 (100.0%), 219.03 (24.8%), 221.03 (9.7%); found 220.03 (100.0%), 219.03 (24.4%), 221.03 (9.4%). Crystals of  $[\text{Me}_3\text{NH}]\text{B4c}$  suitable for an X-ray diffraction study were obtained from an acetone/water solution by slow evaporation of acetone.

$[\text{Et}_3\text{NH}]_2[1,4\text{-}\{(\text{NC})_3\text{B}\}_2\text{-}2,5\text{-F}_2\text{-C}_6\text{H}_2]$  ( $[\text{Et}_3\text{NH}]_2\text{B4d}$ ):  $\text{K}_2\text{B}(\text{CN})_3$  (**K21**, 300 mg, 1.80 mmol)

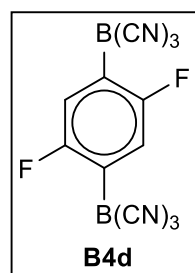

and LiCl (115 mg, 2.71 mmol) was suspended in THF (7 mL). 1,2,4,5-tetrafluorobenzene (0.100 mL, 0.896 mmol) was added with a syringe in one portion. The reaction mixture was stirred at room temperature overnight. All solid materials that had formed were separated by filtration through a plug of Celite and washed with THF ( $2 \times 5$  mL). The Celite plug was washed with

$\text{H}_2\text{O}$  and upon addition of an aqueous solution with an excess of  $[\text{Et}_3\text{NH}]\text{Cl}$  to the aqueous layers ( $\text{pH} < 7$ ) the main product precipitated.  $[\text{Et}_3\text{NH}]_2\text{B4d}$  was separated by filtration and dried in a vacuum. Yield: 185 mg (0.374 mmol, 42%, calculated for the fluoroarene). A second product crop was obtained from the combined THF layers: The solvent was removed first, the residue was dissolved in  $\text{H}_2\text{O}$  and the addition of an aqueous solution of  $[\text{Et}_3\text{NH}]\text{Cl}$  yielded 100 mg of a mixture of  $[\text{Et}_3\text{NH}]_2\text{B4d}$  and  $[\text{Et}_3\text{NH}]\text{B4c}$  (ratio according to  $^{19}\text{F}$  NMR spectroscopy: 55:45). The NMR spectroscopic data for  $[\text{Et}_3\text{NH}]\text{B4c}$  match with those given above.  $^{11}\text{B}$  NMR (160.5 MHz,  $(\text{CD}_3)_2\text{CO}$ ):  $\delta = -31.1$  ppm (s, 1B).  $^1\text{H}$  NMR (500.1 MHz,  $(\text{CD}_3)_2\text{CO}$ ):  $\delta = 7.76$  (t, br, 2H,  $^1J(^{14}\text{N}, ^1\text{H}) = 49$  Hz, NH), 7.10 (dd, 2H,  $^3J(^{19}\text{F}, ^1\text{H}) = ^4J(^{19}\text{F}, ^1\text{H}) = 7.2$  Hz, H3/6), 3.41 (qd, 12H,  $^3J(^1\text{H}, ^1\text{H}) = 7.3$  Hz, 4.1 Hz,  $\text{CH}_2$ ), 1.37 ppm (t, 18H,  $^3J(^1\text{H}, ^1\text{H}) = 7.3$  Hz,  $\text{CH}_3$ ).  $^{19}\text{F}$  NMR (470.6 MHz,  $(\text{CD}_3)_2\text{CO}$ ):  $\delta = -113.4$  ppm (t, 2F,  $^3J(^{19}\text{F}, ^1\text{H}) = 7.2$  Hz).  $^{13}\text{C}\{^1\text{H}\}$  NMR (125.8 MHz,  $(\text{CD}_3)_2\text{CO}$ ):  $\delta = 162.2$  (dd, 2C,  $^1J(^{19}\text{F}, ^{13}\text{C}) = 241$  Hz,  $^4J(^{19}\text{F}, ^{13}\text{C}) = 3.5$  Hz, C2/5), 128.3 (q, 6C,  $^1J(^{13}\text{C}, ^{11}\text{B}) \approx 64$  Hz, CN), 127.5 (m, br, 2C, C1/4), 120.6 (m, 2C, C3/5), 48.0 (s, 6C,  $\text{CH}_2$ ), 9.2 (s, 6C,  $\text{CH}_3$ ).  $^{13}\text{C}\{^{19}\text{F}\}$  NMR (125.8 MHz,  $(\text{CD}_3)_2\text{CO}$ ):  $\delta = 162.2$  (dd, 2C,  $^{2/3}J(^{13}\text{C}, ^1\text{H}) = 11.1$  Hz, 4.4 Hz, C2/5), 128.3 (q, 6C,  $^1J(^{13}\text{C}, ^{11}\text{B}) \approx 64$  Hz, CN), 127.5 (m, br, 2C, C1), 120.6 (d, 2C,  $^1J(^{13}\text{C}, ^1\text{H}) = 161$  Hz, C3/5), 48.0 (t, 6C,  $^1J(^{13}\text{C}, ^1\text{H}) = 145$  Hz,  $\text{CH}_2$ ), 9.2 (qt, 6C,  $^1J(^{13}\text{C}, ^1\text{H}) = 128$  Hz,  $^2J(^{13}\text{C}, ^1\text{H}) = 3.7$  Hz,  $\text{CH}_3$ ). Elemental analysis: calculated (%) for  $\text{C}_{24}\text{H}_{34}\text{B}_2\text{F}_2\text{N}_8$ , C 58.33, H 6.93, N 22.67; found, C 57.95, H 6.80, N 21.14. (–)-ESI-MS,  $m/z$ ,  $[(\text{C}_6\text{F}_2\text{H}_2)\{(\text{CN})_3\text{B}\}_2]^{2-}$ : calculated 145.02 (100.0%), 144.53 (49.7%), 145.53 (13.0%); found 145.02 (100.0%), 144.53 (48.9%), 145.53

(12.1%). Crystals of  $[\text{Et}_3\text{NH}]_2\text{B4d}$  suitable for an X-ray diffraction study were obtained from an acetone/water solution by slow evaporation of acetone.

**K[1-{(NC)<sub>3</sub>B}-2,3,5,6-F<sub>4</sub>-C<sub>6</sub>H] (KB5): 1. Entry:** Method B was employed for the preparation

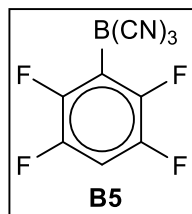

of **KB5**, using pentafluorobenzene (0.3 mL, 2.7 mmol), **K<sub>2</sub>1** (200 mg, 1.20 mmol) and LiCl (80.0 mg, 1.89 mmol). The arene was added at  $-78\text{ }^\circ\text{C}$ , warmed up to room temperature, and the reaction mixture was stirred for 10 minutes. Yield: 205 mg (0.740 mmol, 62%). The product contained ca. 6% of

another isomer. **2. Entry:** Method B was employed for the preparation of **KB5**, using pentafluorobenzene (0.5 mL, 4.5 mmol) and **K<sub>2</sub>1** (350 mg, 2.08 mmol) without addition of LiCl. The arene was added at  $-78\text{ }^\circ\text{C}$ , warmed up to room temperature, and the reaction mixture was stirred for 2 days. Yield: 225 mg (0.812 mmol, 39%). The product contained ca. 20% of other isomers and  $[\text{BH}(\text{CN})_3]^-$ .  $^{11}\text{B}$  NMR (160.5 MHz,  $(\text{CD}_3)_2\text{CO}$ ):  $\delta = -33.7$  ppm (tt, 1B,  $^3J(^{19}\text{F}, ^{11}\text{B}) = 7.6$  Hz,  $^4J(^{19}\text{F}, ^{11}\text{B}) = 3.1$  Hz).  $^1\text{H}$  NMR (500.1 MHz,  $(\text{CD}_3)_2\text{CO}$ ):  $\delta = 7.33$  (tt, 1H,  $^3J(^{19}\text{F}, ^1\text{H}) = 10.1$  Hz,  $^4J(^{19}\text{F}, ^1\text{H}) = 7.5$  Hz).  $^{19}\text{F}$  NMR (470.6 MHz,  $(\text{CD}_3)_2\text{CO}$ ):  $\delta = -132.7$  (m, 2F, F2/6),  $-141.8$  ppm (m, 2F, F3/5).  $^{13}\text{C}\{^1\text{H}\}$  NMR (125.8 MHz,  $(\text{CD}_3)_2\text{CO}$ ):  $\delta = 148.3$  (dddd, 2C,  $^1J(^{19}\text{F}, ^{13}\text{C}) = 244$  Hz,  $^{3/4}J(^{19}\text{F}, ^{13}\text{C}) \approx 13$  Hz, 11 Hz,  $^5J(^{19}\text{F}, ^{13}\text{C}) \approx 4$  Hz, C2/6),  $146.5$  (dm, 2C,  $^1J(^{19}\text{F}, ^{13}\text{C}) = 247$  Hz, C3/5),  $127.0$  (q, 3C,  $^1J(^{13}\text{C}, ^{11}\text{B}) = 67$  Hz, CN),  $118.3$  (qt, 1C,  $^1J(^{13}\text{C}, ^{11}\text{B}) = 56$  Hz,  $^2J(^{19}\text{F}, ^{13}\text{C}) = 24$  Hz, C1),  $106.1$  ppm (tt, 1C,  $^2J(^{19}\text{F}, ^{13}\text{C}) = 23.2$  Hz,  $^3J(^{19}\text{F}, ^{13}\text{C}) = 1.4$  Hz, C4).  $^{13}\text{C}\{^{19}\text{F}\}$  NMR (125.8 MHz,  $(\text{CD}_3)_2\text{CO}$ ):  $\delta = 148.3$  (d, 2C,  $^3J(^{13}\text{C}, ^1\text{H}) = 9.0$  Hz, C2/6),  $146.5$  (m, 2C, C3/5),  $127.0$  (q, 3C,  $^1J(^{13}\text{C}, ^{11}\text{B}) = 67$  Hz, CN),  $118.3$  (q, 1C,  $^1J(^{13}\text{C}, ^{11}\text{B}) = 56$  Hz, C1),  $106.1$  ppm (d, 1C,  $^1J(^{13}\text{C}, ^1\text{H}) = 169$  Hz, C4). Elemental analysis: calculated (%) for  $\text{C}_9\text{HBF}_4\text{KN}_3$ , C 39.02, H 0.36, N 15.17; found, C 40.02, H 0.42, N 14.12. (-)-ESI-MS, m/z,  $[(\text{C}_6\text{F}_4\text{H})\text{B}(\text{CN})_3]^-$ : calculated 238.02 (100.0%), 237.02 (24.8%), 239.02 (9.7%); found 238.02 (100.0%), 237.02 (24.1%), 239.02 (9.3%).

**K[1-{(NC)<sub>3</sub>B}-C<sub>6</sub>F<sub>5</sub>] (KB6a):** The preparation of **KB6a** was performed as described in the

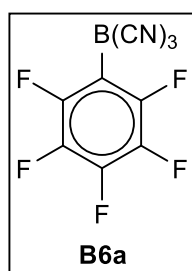

literature and the NMR spectroscopic data are consistent to the published ones.<sup>10</sup> (-)-ESI-MS, m/z,  $[(\text{C}_6\text{F}_5)\text{B}(\text{CN})_3]^-$ : calculated 256.01 (100.0%), 255.01 (24.8%), 257.01 (9.7%), found 256.01 (100.0%), 255.01 (24.7%), 257.01 (9.5%).

**K<sub>2</sub>[1,4-{(NC)<sub>3</sub>B}<sub>2</sub>-C<sub>6</sub>F<sub>4</sub>]** (**K<sub>2</sub>B6b**): Method A was employed for the preparation of **K<sub>2</sub>B6b**

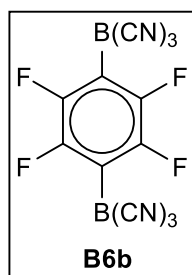

using hexafluorobenzene (2.30 mL, 19.9 mmol), **K<sub>2</sub>1** (7.20 g, 43.1 mmol) and THF (50 mL). The reaction mixture was heated to reflux for 20 hrs. The Celite plug was extracted with THF (2 × 50 mL) and CH<sub>3</sub>CN (200 mL) due to the low solubility of **K<sub>2</sub>B6b** in THF. Yield: 5.95 g (14.7 mmol, 74%, calculated for C<sub>6</sub>F<sub>6</sub>). The following analytical data were obtained for

[Et<sub>4</sub>N]<sub>2</sub>[**B6b**] which was precipitated from an aqueous solution of **K<sub>2</sub>B6b** with aqueous [Et<sub>4</sub>N]OH, filtered off and dried in a vacuum. <sup>11</sup>B NMR (160.5 MHz, (CD<sub>3</sub>)<sub>2</sub>CO): δ = -34.7 ppm (s, 2B). <sup>19</sup>F NMR (470.6 MHz, (CD<sub>3</sub>)<sub>2</sub>CO): δ = -133.8 ppm (s, 4F). <sup>13</sup>C{<sup>1</sup>H} NMR (125.8 MHz, (CD<sub>3</sub>)<sub>2</sub>CO): δ = 148.2 (dm, 4C, <sup>1</sup>J(<sup>19</sup>F, <sup>13</sup>C) ≈ 250 Hz, C2/3/5/6), 127.4 (q, 6C, <sup>1</sup>J(<sup>13</sup>C, <sup>11</sup>B) = 67 Hz, CN), 116.7 ppm (m, 2C, C1/C4). <sup>13</sup>C{<sup>13</sup>B, <sup>1</sup>H} NMR (75.5 Hz, (CD<sub>3</sub>)<sub>2</sub>CO): δ = 148.2 (dm, 4C, <sup>1</sup>J(<sup>19</sup>F, <sup>13</sup>C) = 247 Hz, C2/3/5/6), 127.4 (s, 6C, CN), 116.6 ppm (m, 2C, C1/C4). Elemental analysis: calculated (%) for C<sub>28</sub>H<sub>40</sub>B<sub>2</sub>F<sub>4</sub>N<sub>8</sub>, C 57.36, H 6.88, N 19.11; found, C 57.36, H 6.97, N 18.35. (-)-ESI-MS, m/z, [(C<sub>6</sub>F<sub>4</sub>){B(CN)<sub>3</sub>}<sub>2</sub>]<sup>2-</sup>: calculated 163.02 (100.0%), 162.52 (49.7%), 163.52 (13.0%); found 163.02 (100.0%), 162.52 (47.3%), 163.52 (11.9%). Crystals of [Et<sub>4</sub>N]<sub>2</sub>[**B6b**] suitable for an X-ray diffraction study were obtained from an acetone solution by slow evaporation of the solvent.

**K[4-{(NC)<sub>3</sub>B}-C<sub>5</sub>F<sub>4</sub>N]** (**KPy1**): Method A was employed for the preparation of **KPy1** using

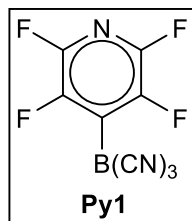

pentafluoropyridine (ca. 0.8 mL, 7.3 mmol), **K<sub>2</sub>1** (400 mg, 2.39 mmol) and THF (15 mL). The pyridine was added at -40 °C and the reaction mixture was stirred at room temperature for 12 hrs. Yield: 575 mg (1.94 mmol, 81%; contained ca. 15% of other tricyano(fluoropyridinyl)borates). <sup>11</sup>B NMR

(160.5 MHz, (CD<sub>3</sub>)<sub>2</sub>CO): δ = -33.9 ppm (tt, 1B, <sup>3</sup>J(<sup>19</sup>F, <sup>11</sup>B) = 6.2 Hz, <sup>4</sup>J(<sup>19</sup>F, <sup>11</sup>B) ≈ 2.5 Hz). <sup>19</sup>F NMR (470.6 MHz, (CD<sub>3</sub>)<sub>2</sub>CO): δ = -96.0 (m, 2F, F2/6), -134.7 ppm (m, 2F, F3/5). <sup>13</sup>C{<sup>1</sup>H} NMR (125.8 MHz, (CD<sub>3</sub>)<sub>2</sub>CO): δ = 145.2–142.8 (m, 4C, C2/3/5/6), 133.5 (m, 1C, C4), 125.8 ppm (q, 3C, <sup>1</sup>J(<sup>13</sup>C, <sup>11</sup>B) ≈ 68 Hz, CN). <sup>13</sup>C{<sup>19</sup>F} NMR (125.8 MHz, (CD<sub>3</sub>)<sub>2</sub>CO): δ = 144.1 (s, 2C, C3/5), 144.0 (s, 2C, C2/6), 133.7 (q, 1C, <sup>1</sup>J(<sup>13</sup>C, <sup>11</sup>B) = 54 Hz, C4), 125.9 ppm (q, 3C, <sup>1</sup>J(<sup>13</sup>C, <sup>11</sup>B) = 68 Hz, CN). <sup>13</sup>C{<sup>13</sup>B, <sup>1</sup>H} NMR (75.5 Hz, (CD<sub>3</sub>)<sub>2</sub>CO): δ = 145.6–141.7 (m, 4C, C2/3/5/6), 132.5 (tt, 1C, <sup>2</sup>J(<sup>19</sup>F, <sup>13</sup>C) = 21.7 Hz, <sup>3</sup>J(<sup>19</sup>F, <sup>13</sup>C) = 1.1 Hz, C4), 125.6 ppm (t, 3C, <sup>4</sup>J(<sup>19</sup>F, <sup>13</sup>C) = 1.1 Hz, CN). (-)-ESI-MS, m/z, [(NC<sub>5</sub>F<sub>4</sub>)B(CN)<sub>3</sub>]<sup>-</sup>: calculated 239.02 (100.0%), 238.02 (24.8%), 240.02 (8.7%); found 239.02 (100.0%), 238.02 (24.4%), 240.02

(8.6%). Crystals of **KPy1** suitable for an X-ray diffraction study were obtained by slow diffusion of dichloromethane into an acetone solution.

**K<sub>2</sub>[2,4-{(NC)<sub>3</sub>B}<sub>2</sub>-C<sub>5</sub>F<sub>3</sub>N]** (**K<sub>2</sub>Py2**): Method A was employed for the preparation of **K<sub>2</sub>Py2**

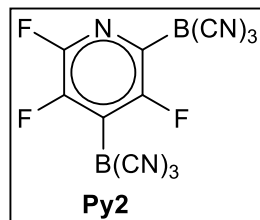

using pentafluoropyridine (0.160 mL, 1.46 mmol), **K<sub>2</sub>1** (500 mg, 2.99 mmol) and THF (15 mL). The pyridine was added at  $-60\text{ }^{\circ}\text{C}$  and the reaction mixture was stirred for 4 days. Addition of  $\text{CH}_2\text{Cl}_2$  to the combined THF layers resulted in two fractions. The first fraction was pure **K<sub>3</sub>Py3** (85.0 mg, 0.171 mmol, 12%; for the analytical data see the

following experiment). Yield (2. fraction, only): 335 mg (0.866 mmol, 59%; calculated for  $\text{C}_5\text{F}_5\text{N}$ ; contained 15% of **K<sub>3</sub>Py3** and 10% of another tricyano(fluoropyridinyl)borate).  $^{11}\text{B}$  NMR (160.5 MHz,  $(\text{CD}_3)_2\text{CO}$ ):  $\delta = -30.9$  (s, 1B, B2),  $-33.9$  ppm (s, 1B, B4).  $^{19}\text{F}$  NMR (470.6 MHz,  $(\text{CD}_3)_2\text{CO}$ ):  $\delta = -94.7$  (dd, 1F,  $^{3/5}J(^{19}\text{F}, ^{19}\text{F}) = 30.0$  Hz, 32.3 Hz, F6),  $-108.3$  (m, 1F, F3),  $-132.4$  ppm (m, 1F, F5).  $^{13}\text{C}\{^1\text{H}\}$  NMR (125.8 MHz,  $(\text{CD}_3)_2\text{CO}$ ):  $\delta = 161.9$  (d, 1C,  $^1J(^{19}\text{F}, ^{13}\text{C}) \approx 253$  Hz, C3), 147.9 (dm, 1C,  $^1J(^{19}\text{F}, ^{13}\text{C}) \approx 230$  Hz, C6), 146.3 (ddd, 1C,  $^1J(^{19}\text{F}, ^{13}\text{C}) = 259$  Hz,  $^{2/3}J(^{19}\text{F}, ^{13}\text{C}) = 32.0$  Hz, 8.6 Hz, C5), 142.8 (m, br, 1C, C2), 130.4–125.7 ppm (m, 7C, C4/CN). (–)-ESI-MS,  $m/z$ ,  $[(\text{NC}_5\text{F}_3)\{\text{B}(\text{CN})_3\}_2]^{2-}$ : calculated 154.52 (100.0%), 154.02 (49.7%), 155.02 (11.9%); found 154.52 (100.0%), 154.02 (47.9%), 155.02 (11.2%). Crystals of **K<sub>2</sub>Py2**· $\text{OC}(\text{CH}_3)_2$  suitable for an X-ray diffraction study were obtained from an acetone solution by slow evaporation of the solvent.

**K<sub>3</sub>[2,4,6-{(NC)<sub>3</sub>B}<sub>3</sub>-C<sub>5</sub>F<sub>2</sub>N]** (**K<sub>3</sub>Py3**): Method A was employed for the preparation of **K<sub>3</sub>Py3**

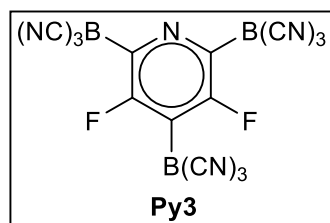

using pentafluoropyridine (0.108 mL, 0.988 mmol), **K<sub>2</sub>1** (500 mg, 2.99 mmol) and THF (10 mL). The pyridine was added at  $-78\text{ }^{\circ}\text{C}$  and the reaction mixture was stirred at room temperature for four days. Upon addition of  $\text{CH}_2\text{Cl}_2$  to the combined THF layers two

fractions were obtained. The first fraction was pure **K<sub>3</sub>Py3** and the second fraction was a mixture of **K<sub>3</sub>Py3** and **K<sub>2</sub>Py2** (4:6; 150 mg, 0.340 mmol, 34%). Yield (1. fraction, only): 150 mg (0.302 mmol, 31%, calculated for  $\text{C}_5\text{F}_5\text{N}$ ).  $^{11}\text{B}$  NMR (160.5 MHz,  $(\text{CD}_3)_2\text{CO}$ ):  $\delta = -30.0$  (s, br, 2B, B2/6),  $-33.9$  ppm (s, 1B, B4).  $^{19}\text{F}$  NMR (470.6 MHz,  $(\text{CD}_3)_2\text{CO}$ ):  $\delta = -107.5$  ppm (s, 2F).  $^{13}\text{C}\{^1\text{H}\}$  NMR (125.8 MHz,  $(\text{CD}_3)_2\text{CO}$ ):  $\delta = 164.7$  (dd, 2C,  $^1J(^{19}\text{F}, ^{13}\text{C}) = 258$  Hz,  $^3J(^{19}\text{F}, ^{13}\text{C}) = 5.7$  Hz, C3/5), 146.4 (m, 2C, C2/6), 128.3 (m, 9C, CN), 118.4 ppm (m, 1C, C4). (–)-ESI-MS,  $m/z$ ,  $[(\text{NC}_5\text{F}_2)\{\text{B}(\text{CN})_3\}_3]^{3-}$ : calculated 126.35 (100.0%), 126.02 (66.9%), 125.69 (16.6%), 126.69 (13.6%); found 126.35 (100.0%), 126.02 (69.6%), 125.69 (16.7%),

126.69 (13.7%). Crystals of  $K_3\text{Py}3 \cdot 3\text{THF} \cdot 1.04\text{H}_2\text{O}$  suitable for an X-ray diffraction study were obtained by slow diffusion of hexane in a THF solution.

**K[4- $\{(\text{NC})_3\text{B}\}_2\text{-C}_{12}\text{F}_9$ ] (KBP1):** Method A was employed for the preparation of **KBP1** using

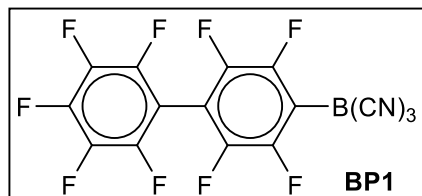

decafluorobiphenyl (750 mg, 2.24 mmol),  $K_2\text{I}$  (300 mg, 1.80 mmol) and THF (15 mL). The reaction mixture was stirred at room temperature for 2 hrs. Upon addition of  $\text{CH}_2\text{Cl}_2$  to the combined THF layers two fractions were

obtained. The first fraction contained impurities (mainly  $K_2\text{BP}2$ , see next example) and was neglected. Yield (2. fraction, only): 390 mg (0.880 mmol, 49%).  $^{11}\text{B}$  NMR (160.5 MHz,  $(\text{CD}_3)_2\text{CO}$ ):  $\delta = -33.7$  ppm (s, 1B).  $^{19}\text{F}$  NMR (470.6 MHz,  $(\text{CD}_3)_2\text{CO}$ ):  $\delta = -131.4$  (m, 2F, F3/5),  $-139.8$  (m, 2F, F2'/6'),  $-141.6$  (m, 2F, F2/6),  $-153.2$  (tt, 1F,  $^3J(^{19}\text{F}, ^{19}\text{F}) = 20.5$  Hz,  $^4J(^{19}\text{F}, ^{19}\text{F}) = 3.0$  Hz, F4'),  $-163.3$  ppm (m, 2F, F3'/5').  $^{13}\text{C}\{^1\text{H}\}$  NMR (125.8 MHz,  $(\text{CD}_3)_2\text{CO}$ ):  $\delta = 148.6$  (ddd, 2C,  $^1J(^{19}\text{F}, ^{13}\text{C}) = 245$  Hz,  $^{2/3}J(^{19}\text{F}, ^{13}\text{C}) = 12$  Hz, 4 Hz, C3/5),  $145.4$  (dm, 2C,  $^1J(^{19}\text{F}, ^{13}\text{C}) = 250$  Hz, C2'/6'),  $144.6$  (dm, br, 2C,  $^1J(^{19}\text{F}, ^{13}\text{C}) = 251$  Hz, C2/6),  $143.3$  (tt, 1C,  $^1J(^{19}\text{F}, ^{13}\text{C}) = 254$  Hz,  $^2J(^{19}\text{F}, ^{13}\text{C}) = 13.5$  Hz,  $^3J(^{19}\text{F}, ^{13}\text{C}) = 5.2$  Hz, C4'),  $138.9$  (dm, 2C,  $^1J(^{19}\text{F}, ^{13}\text{C}) = 250$  Hz, C3'/C5'),  $126.7$  (q, 3C,  $^1J(^{13}\text{C}, ^{11}\text{B}) = 68$  Hz, CN),  $121.1$  (qt, 1C,  $^1J(^{13}\text{C}, ^{11}\text{B}) \approx 55$  Hz,  $^2J(^{19}\text{F}, ^{13}\text{C}) \approx 25$  Hz, C4),  $105.8$  (t, 1C,  $^2J(^{19}\text{F}, ^{13}\text{C}) = 18$  Hz, C1'),  $103.6$  ppm (t, 1C,  $^2J(^{19}\text{F}, ^{13}\text{C}) = 19$  Hz, C1).  $^{13}\text{C}\{^{19}\text{F}\}$  NMR (125.8 MHz,  $(\text{CD}_3)_2\text{CO}$ ):  $\delta = 148.6$  (s, 2C, C3/5),  $145.4$  (s, 2C, C2'/6'),  $144.6$  (s, br, 2C, C2/6),  $143.3$  (s, 1C, C4'),  $138.9$  (s, 2C, C3'/C5'),  $126.7$  (q, 3C,  $^1J(^{13}\text{C}, ^{11}\text{B}) = 68$  Hz, CN),  $121.1$  (q, 1C,  $^1J(^{13}\text{C}, ^{11}\text{B}) = 55$  Hz, C4),  $105.8$  (s, 1C, C1'),  $103.6$  ppm (s, 1C, C1). Elemental analysis: calculated (%) for  $\text{C}_{15}\text{BF}_9\text{KN}_3$ , C 40.66, N 9.48; found, C 40.81, N 9.81. (-)-ESI-MS,  $m/z$ ,  $[(\text{C}_{12}\text{F}_9)\text{B}(\text{CN})_3]^-$ : calculated 404.00 (100.0%), 403.01 (24.8%), 405.01 (16.2%); found 404.00 (100.0%), 403.01 (25.0%), 405.01 (16.3%).

**K<sub>2</sub>[4,4'- $\{(\text{NC})_3\text{B}\}_2\text{-C}_{12}\text{F}_8$ ] (K<sub>2</sub>BP2):** Method A was employed for the preparation of **K<sub>2</sub>BP2**

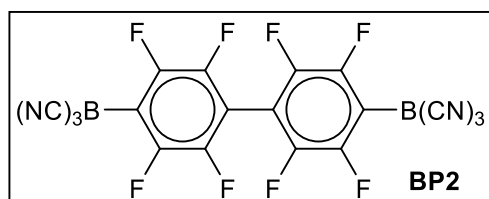

using decafluorobiphenyl (450 mg, 1.35 mmol),  $K_2\text{I}$  (500 mg, 2.99 mmol) and THF (10 mL). The reaction mixture was stirred at 50 °C for 1 hr. Yield: 675 mg (1.22 mmol, 90%, calculated for  $\text{C}_{10}\text{F}_{10}$ ).

$^{11}\text{B}$  NMR (160.5 MHz,  $(\text{CD}_3)_2\text{CO}$ ):  $\delta = -33.7$  ppm (s, 2B).  $^{19}\text{F}$  NMR (470.6 MHz,  $(\text{CD}_3)_2\text{CO}$ ):  $\delta = -131.7$  (s, br, 4F, F3/5),  $-141.7$  ppm (m, 4F, F2/6).  $^{13}\text{C}\{^1\text{H}\}$  NMR (125.8 MHz,  $(\text{CD}_3)_2\text{CO}$ ):  $\delta = 148.5$  (dm, 4C,  $^1J(^{19}\text{F}, ^{13}\text{C}) \approx 245$  Hz, C3/5),  $144.6$  (dd, 4C,  $^1J(^{19}\text{F}, ^{13}\text{C}) \approx 250$  Hz,  $^2J(^{19}\text{F}, ^{13}\text{C})$



$\approx 18$  Hz, C2/6), 126.7 (q, 6C,  $^1J(^{13}\text{C}, ^{11}\text{B}) = 67$  Hz, CN), 120.3 (m, 2C, C4), 107.1 ppm (m, 2C, C1).  $^{13}\text{C}\{^{19}\text{F}\}$  NMR (125.8 MHz,  $(\text{CD}_3)_2\text{CO}$ ):  $\delta = 148.5$  (s, 4C, C3/5), 144.5 (s, 4C, C2/6), 126.7 (q, 6C,  $^1J(^{13}\text{C}, ^{11}\text{B}) \approx 66$  Hz, CN), 120.3 (q, br, 2C,  $^1J(^{13}\text{C}, ^{11}\text{B}) \approx 53$  Hz, C4), 107.1 ppm (s, 2C, C1).  $^{13}\text{C}\{^{13}\text{B}, ^1\text{H}\}$  NMR (75.5 Hz,  $(\text{CD}_3)_2\text{CO}$ ):  $\delta = 148.5$  (dm, 4C,  $^1J(^{19}\text{F}, ^{13}\text{C}) \approx 246$  Hz, C3/5), 144.6 (dd, 4C,  $^1J(^{19}\text{F}, ^{13}\text{C}) \approx 250$  Hz,  $^2J(^{19}\text{F}, ^{13}\text{C}) \approx 18$  Hz, C2/6), 126.7 (t, 6C,  $^4J(^{19}\text{F}, ^{13}\text{C}) = 1.3$  Hz, CN), 120.3 (t, 2C,  $^2J(^{19}\text{F}, ^{13}\text{C}) = 23.8$  Hz, C4), 107.1 ppm (m, 2C, C1). Elemental analysis: calculated (%) for  $\text{C}_{18}\text{B}_2\text{F}_8\text{K}_2\text{N}_6$ , C 39.16, N 15.22; found, C 39.05, N 14.62. (-)-ESI-MS,  $m/z$ ,  $[(\text{C}_{12}\text{F}_8)\{\text{B}(\text{CN})_3\}_2]^{2-}$ : calculated 237.01 (100.0%), 236.51 (49.7%), 237.51 (19.5%), 237.02 (9.7%); found 237.01 (100.0%), 236.51 (44.9%), 237.51 (17.2%). Crystals of  $\text{K}_2\text{BP2}\cdot\text{THF}$  suitable for an X-ray diffraction study were obtained by slow diffusion of hexane into a THF solution.

**K[2- $\{(\text{NC})_3\text{B}\}$ - $\text{C}_{10}\text{F}_7$ ] (KN1):** Method A was employed for the preparation of KN1 using

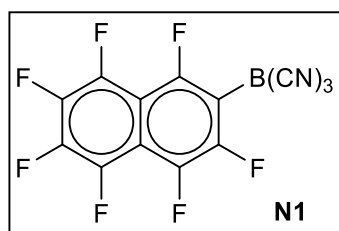

octafluoronaphthalene (650 mg, 2.39 mmol) and  $\text{K}_2\mathbf{1}$  (200 mg, 1.20 mmol). The reaction mixture was stirred at room temperature for 3 days. The crude product was washed with  $\text{CH}_2\text{Cl}_2$  (100 mL) and then dissolved in THF (10 mL) again. Addition of  $\text{CH}_2\text{Cl}_2$  resulted in solid KN1. Yield: 250 mg (0.656

mmol, 55%).  $^{11}\text{B}$  NMR (160.5 MHz,  $(\text{CD}_3)_2\text{CO}$ ):  $\delta = -33.6$  ppm (dd, 1B,  $^2J(^{19}\text{F}, ^{11}\text{B}) \approx 8$  Hz ( $2\times$ )).  $^{19}\text{F}$  NMR (470.6 MHz,  $(\text{CD}_3)_2\text{CO}$ ):  $\delta = -107.3$  (d, 1F,  $^4J(^{19}\text{F}, ^{19}\text{F}) = 74$  Hz, F1),  $-127.3$  (s, 1F, F3),  $-146.3$  (dddm, 1F,  $^4J(^{19}\text{F}, ^{19}\text{F}) = 74$  Hz,  $^3J(^{19}\text{F}, ^{19}\text{F}) \approx ^5J(^{19}\text{F}, ^{19}\text{F}) \approx 17$  Hz, F8),  $-149.4$  (dddd, 1F,  $^4J(^{19}\text{F}, ^{19}\text{F}) = 56$  Hz,  $^3J(^{19}\text{F}, ^{19}\text{F}) \approx ^5J(^{19}\text{F}, ^{19}\text{F}) \approx 16$  Hz,  $J(^{19}\text{F}, ^{19}\text{F}) = 5$  Hz, F5),  $-153.3$  (dddm, 1F,  $^4J(^{19}\text{F}, ^{19}\text{F}) = 56$  Hz,  $^3J(^{19}\text{F}, ^{19}\text{F}) \approx ^5J(^{19}\text{F}, ^{19}\text{F}) \approx 18$  Hz, F4),  $-157.3$  (ddm, 1F,  $^3J(^{19}\text{F}, ^{19}\text{F}) \approx ^3J(^{19}\text{F}, ^{19}\text{F}) \approx 18$  Hz, F6),  $-159.6$  ppm (ddm, 1F,  $^3J(^{19}\text{F}, ^{19}\text{F}) \approx ^3J(^{19}\text{F}, ^{19}\text{F}) \approx 18$  Hz, F7).  $^{13}\text{C}\{^1\text{H}\}$  NMR (125.8 MHz,  $(\text{CD}_3)_2\text{CO}$ ):  $\delta = 154.4$  (d, 1C,  $^1J(^{19}\text{F}, ^{13}\text{C}) = 255$  Hz, C3), 150.5 (ddd, 1C,  $^1J(^{19}\text{F}, ^{13}\text{C}) = 248$  Hz,  $J(^{19}\text{F}, ^{13}\text{C}) \approx 12$  Hz ( $2\times$ )), 142.2 (dm, 1C,  $^1J(^{19}\text{F}, ^{13}\text{C}) \approx 255$  Hz), 141.7 (dm, 1C,  $^1J(^{19}\text{F}, ^{13}\text{C}) = 255$  Hz), 140.9 (dm, 1C,  $^1J(^{19}\text{F}, ^{13}\text{C}) = 252$  Hz), 140.2 (ddd, br, 1C,  $^1J(^{19}\text{F}, ^{13}\text{C}) = 252$  Hz,  $J(^{19}\text{F}, ^{13}\text{C}) \approx 15$  Hz ( $2\times$ )), 139.1 (ddd, br, 1C,  $^1J(^{19}\text{F}, ^{13}\text{C}) = 250$  Hz,  $J(^{19}\text{F}, ^{13}\text{C}) \approx 15$  Hz ( $2\times$ )), 127.0 (q, 3C,  $^1J(^{13}\text{C}, ^{11}\text{B}) \approx 67$  Hz, CN), 116.8 (qd, 1C,  $^1J(^{13}\text{C}, ^{11}\text{B}) \approx 56$  Hz,  $^2J(^{19}\text{F}, ^{13}\text{C}) \approx 28$  Hz, C2), 112.2 (dd, 1C,  $J(^{19}\text{F}, ^{13}\text{C}) \approx 12$  Hz ( $2\times$ ), C4a), 108.9 ppm (dd, 1C,  $J(^{19}\text{F}, ^{13}\text{C}) \approx 19$  Hz, 12 Hz, C8a) [A definite assignment even with the aid of calculated chemical shifts was not possible].  $^{13}\text{C}\{^{19}\text{F}\}$  NMR (125.8 MHz,  $(\text{CD}_3)_2\text{CO}$ ):  $\delta = 154.4$  (s, 1C), 150.5 (s, 1C), 142.2 (s, 1C), 141.7 (s, 1C), 140.2 (s, 1C), 140.9 (s, br, 1C), 139.1 (s, 1C), 127.0 (q, 3C,  $^1J(^{13}\text{C}, ^{11}\text{B}) \approx 67$  Hz, CN), 116.8 (q, 1C,  $^1J(^{13}\text{C}, ^{11}\text{B}) \approx 56$  Hz, C2),

112.2 (s, 1C, C4a), 108.9 ppm (s, 1C, C8a) [A definite assignment even with the aid of calculated chemical shifts was not possible]. Elemental analysis: calculated (%) for  $C_{13}BF_7KN_3$ , C 40.98, N 11.03; found, C 40.81, N 11.01. (-)-ESI-MS, m/z,  $[(C_{10}F_7)B(CN)_3]^-$ : calculated 342.01 (100.0%), 341.01 (24.8%), 343.01 (14.1%); found 342.01 (100.0%), 341.01 (23.2%), 343.01 (13.3%).

**K<sub>2</sub>[2,6- $\{(NC)_3B\}_2-C_{10}F_6]$  (K<sub>2</sub>N2):** Modified Method A was employed for the preparation of

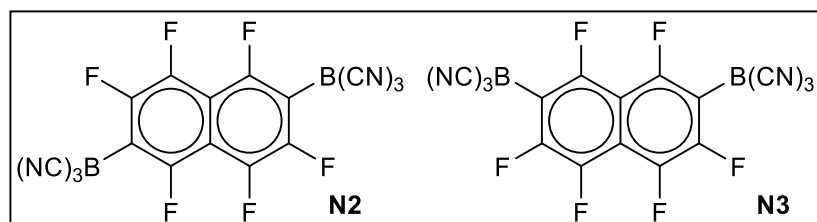

K<sub>2</sub>N2 using octafluoro-naphthalene (163 mg, 0.599 mmol), K<sub>2</sub>1 (200 mg, 1.20 mmol) and THF (5 mL).

The reaction mixture was stirred at 60 °C for 16 hrs. All solids that had formed were separated by filtration through a plug of Celite and washed with cold THF (3 × 1.5 mL). Then, the plug was washed with H<sub>2</sub>O (10 mL), and after reducing the volume and cooling to 0 °C small colourless needles had formed. These were decanted and dried in a vacuum. Yield: 70.0 mg (0.143 mmol, 24%; calculated for C<sub>10</sub>F<sub>8</sub>). The combined THF layers contained additional product which could not be separated from other isomers formed. The total ratio of the borates formed was 0.4:1.0:0.7 (KN1:K<sub>2</sub>N2:K<sub>2</sub>N3; N3 = [2,7- $\{(NC)_3B\}_2-C_{10}F_6]^{2-}$ ). NMR spectroscopic data for K<sub>2</sub>N2: <sup>11</sup>B NMR (160.5 MHz, (CD<sub>3</sub>)<sub>2</sub>CO): δ = -33.6 ppm (dd, 1B, <sup>2</sup>J(<sup>19</sup>F, <sup>11</sup>B) ≈ 8 Hz (2×)). <sup>19</sup>F NMR (470.6 MHz, (CD<sub>3</sub>)<sub>2</sub>CO): δ = -108.8 (m, 2F, F1/5), -130.1 (s, 2F, F3/7), -152.1 ppm (m, 2F, F4/8). <sup>13</sup>C{<sup>19</sup>F} NMR (125.8 MHz, (CD<sub>3</sub>)<sub>2</sub>CO): δ = 154.2 (s, 2C, C1/5), 149.7 (s, 2C, C3/7), 140.9 (s, 2C, C4/8), 127.3 (q, 6C, <sup>1</sup>J(<sup>13</sup>C, <sup>11</sup>B) = 67 Hz, CN), 116.7 (q, 2C, <sup>1</sup>J(<sup>13</sup>C, <sup>11</sup>B) = 55 Hz, C2/6), 112.9 ppm (s, 2C, C4a/8a). Elemental analysis (the salt used contained one equivalent of H<sub>2</sub>O): calculated (%) for C<sub>16</sub>H<sub>2</sub>B<sub>2</sub>F<sub>6</sub>K<sub>2</sub>N<sub>6</sub>O, C 37.83, H 0.40, N 16.54; found, C 37.65, H 0.25, N 15.38. (-)-ESI-MS, m/z,  $[(C_{10}F_6)\{B(CN)_3\}_2]^{2-}$ : calculated 206.01 (100.0%), 205.52 (49.7%), 206.52 (17.3%); found 206.01 (100.0%), 205.52 (48.9%), 206.51 (16.0%). Crystals of K<sub>2</sub>N2·2EtOAc suitable for an X-ray diffraction study were obtained from an ethyl acetate solution by slow evaporation of the solvent. NMR spectroscopic data for K<sub>2</sub>N3: <sup>11</sup>B NMR (160.5 MHz, (CD<sub>3</sub>)<sub>2</sub>CO): δ = <sup>11</sup>B NMR (160.5 MHz, (CD<sub>3</sub>)<sub>2</sub>CO): [the signal is covered by the signal of anion N2]. <sup>19</sup>F NMR (470.6 MHz, (CD<sub>3</sub>)<sub>2</sub>CO): δ = -104.6 (m, 2F, F1/8), -127.6 (m, 2F, F3/6), -154.5 ppm (m, 2F, F4/5). [In the <sup>13</sup>C NMR spectra the signals of anion N3 were not observed.]

**K[1-F<sub>3</sub>C-4-{(NC)<sub>3</sub>B}-C<sub>6</sub>F<sub>4</sub>] (KB7):** Method A was employed for the preparation of **KB7**

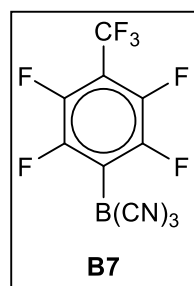

using octafluorotoluene (ca. 0.3 mL, 2.1 mmol) and **K<sub>2</sub>1** (150 mg, 0.898 mmol). The reaction mixture was stirred at room temperature for 3 hrs. Yield: 210 mg (0.609 mmol, 68%). <sup>11</sup>B NMR (160.5 MHz, (CD<sub>3</sub>)<sub>2</sub>CO): δ = -33.8 ppm (tt, 1B, <sup>3</sup>J(<sup>19</sup>F, <sup>11</sup>B) = 7.3 Hz, <sup>4</sup>J(<sup>19</sup>F, <sup>11</sup>B) = 2.8 Hz). <sup>19</sup>F NMR (470.6 MHz, (CD<sub>3</sub>)<sub>2</sub>CO): δ = -57.2 (tt, 3F, <sup>4</sup>J(<sup>19</sup>F, <sup>19</sup>F) = 22 Hz, <sup>5</sup>J(<sup>19</sup>F, <sup>19</sup>F) = 0.6 Hz, CF<sub>3</sub>), -130.4 (m, 2F, C3/5), -144.3 ppm (m, 2F, C2/6). <sup>13</sup>C{<sup>1</sup>H} NMR (125.8 MHz, (CD<sub>3</sub>)<sub>2</sub>CO): δ = 148.8 (dm, 2C, <sup>1</sup>J(<sup>19</sup>F, <sup>13</sup>C) = 246 Hz, C3/5), 144.5 (dm, 2C, <sup>1</sup>J(<sup>19</sup>F, <sup>13</sup>C) = 257 Hz, C2/6), 126.4 (q, 3C, <sup>1</sup>J(<sup>13</sup>C, <sup>11</sup>B) = 68 Hz, CN), 123.6 (qm, 1C, <sup>1</sup>J(<sup>13</sup>C, <sup>11</sup>B) = 55 Hz, C4), 122.1 (qm, 1C, <sup>1</sup>J(<sup>19</sup>F, <sup>13</sup>C) = 273 Hz, CF<sub>3</sub>), 108.8 ppm (qt, 1C, <sup>2</sup>J(<sup>19</sup>F, <sup>13</sup>C) = 34 Hz, <sup>2</sup>J(<sup>19</sup>F, <sup>13</sup>C) = 13 Hz, C1). <sup>13</sup>C{<sup>13</sup>B, <sup>1</sup>H} NMR (75.5 Hz, (CD<sub>3</sub>)<sub>2</sub>CO): δ = 148.8 (dm, 2C, <sup>1</sup>J(<sup>19</sup>F, <sup>13</sup>C) = 246 Hz, C3/5), 144.5 (dm, 2C <sup>1</sup>J(<sup>19</sup>F, <sup>13</sup>C) = 257 Hz, C2/6), 126.3 (t, 3C, <sup>4</sup>J(<sup>19</sup>F, <sup>13</sup>C) = 1.4 Hz, CN), 123.5 (t, 1C, <sup>2</sup>J(<sup>19</sup>F, <sup>13</sup>C) ≈ 24 Hz, C4), 122.1 (qtt, 1C, <sup>1</sup>J(<sup>19</sup>F, <sup>13</sup>C) = 273 Hz, <sup>3</sup>J(<sup>19</sup>F, <sup>13</sup>C) ≈ 3.5 Hz, <sup>4</sup>J(<sup>19</sup>F, <sup>13</sup>C) ≈ 1.5 Hz, CF<sub>3</sub>), 108.8 ppm (qt, 1C, <sup>2</sup>J(<sup>19</sup>F, <sup>13</sup>C) = 34 Hz, <sup>2</sup>J(<sup>19</sup>F, <sup>13</sup>C) = 13 Hz, C1). Elemental analysis: calculated (%) for C<sub>10</sub>BF<sub>7</sub>KN<sub>3</sub>, C 34.81, N 12.18; found, C 34.41, N 12.41. (-)-ESI-MS, m/z, [(CF<sub>3</sub>C<sub>6</sub>F<sub>4</sub>){B(CN)<sub>3</sub>}]<sup>-</sup>: calculated 306.01 (100.0%), 305.01 (24.8%), 307.01 (10.8%); found 306.01 (100.0%), 305.01 (23.4%), 307.01 (10.5%). Crystals of **KB7**·THF suitable for an X-ray diffraction study were obtained from a THF solution by slow evaporation of the solvent.

**K[1-H<sub>3</sub>C-4-{(NC)<sub>3</sub>B}-C<sub>6</sub>F<sub>4</sub>] (KB8a):** Method A was employed for the preparation of **KB8a**

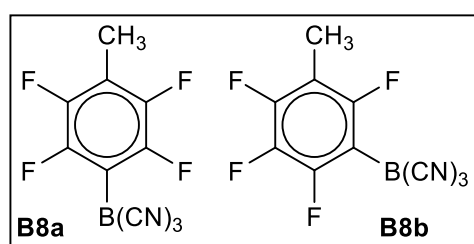

using 2,3,4,5,6-pentafluorotoluene (ca. 0.18 mL, 1.4 mmol) and **K<sub>2</sub>1** (200 mg, 1.20 mmol). The reaction mixture was stirred at 90 °C for 3 days. Yield: not determined. The product contained ca. 10% of **K[1-H<sub>3</sub>C-4-{(NC)<sub>3</sub>B}-C<sub>6</sub>F<sub>4</sub>] (KB8b)**. NMR spectroscopic

data for **KB8a**: <sup>11</sup>B NMR (160.5 MHz, (CD<sub>3</sub>)<sub>2</sub>CO): δ = -33.8 ppm (tt, 1B, <sup>3</sup>J(<sup>19</sup>F, <sup>11</sup>B) = 7.5 Hz, <sup>4</sup>J(<sup>19</sup>F, <sup>11</sup>B) = 3.2 Hz). <sup>19</sup>F NMR (470.6 MHz, (CD<sub>3</sub>)<sub>2</sub>CO): δ = -134.1 (m, 2F, F3/5), -146.7 ppm (dd, 2F, <sup>2/3</sup>J(<sup>19</sup>F, <sup>19</sup>F) = 22 Hz, 14 Hz, F2/6). <sup>1</sup>H NMR (500.1 MHz, (CD<sub>3</sub>)<sub>2</sub>CO): δ = 2.23 ppm (t, 3H, <sup>4</sup>J(<sup>19</sup>F, <sup>1</sup>H) = 2.1 Hz). <sup>13</sup>C{<sup>1</sup>H} NMR (125.8 MHz, (CD<sub>3</sub>)<sub>2</sub>CO): δ = 148.1 (dddd, 2C, <sup>1</sup>J(<sup>19</sup>F, <sup>13</sup>C) = 243 Hz, <sup>2/3</sup>J(<sup>19</sup>F, <sup>13</sup>C) ≈ 14 Hz, 12 Hz, <sup>4</sup>J(<sup>19</sup>F, <sup>13</sup>C) ≈ 4 Hz, C3/5), 145.6 (dm, br, 2C, <sup>1</sup>J(<sup>19</sup>F, <sup>13</sup>C) = 243 Hz, C2/6), 127.3 (q, 3C, <sup>1</sup>J(<sup>13</sup>C, <sup>11</sup>B) = 67 Hz, CN), 116.0 (t, 1C, <sup>2</sup>J(<sup>19</sup>F, <sup>13</sup>C) = 19.4 Hz, C1), 115.3–113.6 (m, 1C, C4), 7.3 ppm (tt, 1C, <sup>3</sup>J(<sup>19</sup>F, <sup>13</sup>C) = 3.5 Hz,

$J(^{19}\text{F}, ^{13}\text{C}) = 2.2$  Hz,  $\text{CH}_3$ ).  $^{13}\text{C}\{^{19}\text{F}\}$  NMR (125.8 MHz,  $(\text{CD}_3)_2\text{CO}$ ):  $\delta = 148.1$  (s, 2C, C3/5), 145.6 (s, br, 2C, C2/6), 127.3 (q, 3C,  $^1J(^{13}\text{C}, ^{11}\text{B}) = 67$  Hz, CN), 116.0 (q, 1C,  $^2J(^{13}\text{C}, ^1\text{H}) = 6.3$  Hz, C1), 114.4 (q, 1C,  $^1J(^{13}\text{C}, ^{11}\text{B}) = 56$  Hz, C4), 7.3 ppm (q, 1C,  $^1J(^{13}\text{C}, ^1\text{H}) = 131$  Hz,  $\text{CH}_3$ ).  $^{13}\text{C}\{^{13}\text{B}, ^1\text{H}\}$  NMR (75.5 Hz,  $(\text{CD}_3)_2\text{CO}$ ):  $\delta = 148.1$  (dddd, 2C,  $^1J(^{19}\text{F}, ^{13}\text{C}) = 243$  Hz,  $^{2/3}J(^{19}\text{F}, ^{13}\text{C}) = 13.6$  Hz, 11.6 Hz,  $^4J(^{19}\text{F}, ^{13}\text{C}) = 3.8$  Hz, C3/5), 145.6 (dddd, 2C,  $^1J(^{19}\text{F}, ^{13}\text{C}) = 243$  Hz,  $^{2/3/4}J(^{19}\text{F}, ^{13}\text{C}) = 16.9$  Hz, 6.5 Hz, 3.5 Hz, C2/6), 127.3 (t, 3C,  $^4J(^{19}\text{F}, ^{13}\text{C}) = 1.3$  Hz, CN), 116.0 (tt, 1C,  $^2J(^{19}\text{F}, ^{13}\text{C}) = 19.4$  Hz,  $^3J(^{19}\text{F}, ^{13}\text{C}) = 1.2$  Hz, C1), 114.4 (tt, 1C,  $^2J(^{19}\text{F}, ^{13}\text{C}) = 23.9$  Hz,  $^3J(^{19}\text{F}, ^{13}\text{C}) = 1.7$  Hz, C4), 7.3 ppm (tt, 1C,  $^3J(^{19}\text{F}, ^{13}\text{C}) = 3.5$  Hz,  $^4J(^{19}\text{F}, ^{13}\text{C}) = 2.2$  Hz,  $\text{CH}_3$ ). NMR spectroscopic data for the side product **KB8b**:  $^{11}\text{B}$  NMR (160.5 MHz,  $(\text{CD}_3)_2\text{CO}$ ):  $\delta = -33.8$  ppm (s, 1B).  $^{19}\text{F}$  NMR (470.6 MHz,  $(\text{CD}_3)_2\text{CO}$ ):  $\delta = -109.2$  (s, 1F, F2),  $-130.4$  (m, 1F, F4),  $-140.5$  (d, 1F,  $^{2/3}J(^{19}\text{F}, ^{19}\text{F}) = 20.6$  Hz, F6),  $-169.6$  ppm (ddd, 1F,  $^{2/3}J(^{19}\text{F}, ^{19}\text{F}) = 21.0$  Hz (2 $\times$ ), 11.9 Hz, F5).  $^1\text{H}$  NMR (500.1 MHz,  $(\text{CD}_3)_2\text{CO}$ ):  $\delta = 2.14$  ppm (dd, 3H,  $^4J(^{19}\text{F}, ^1\text{H}) = 2.2$  Hz, 1.3 Hz).  $^{13}\text{C}\{^{19}\text{F}\}$  NMR (125.8 MHz,  $(\text{CD}_3)_2\text{CO}$ ):  $\delta = 158.0$  (m, 1C, C2), 151.1 (s, 1C, C4), 149.6 (q, 1C,  $^3J(^{13}\text{C}, ^1\text{H}) = 4.3$  Hz, C6), 137.5 (s, 1C, C5), 127.5 (q, 3C,  $^1J(^{13}\text{C}, ^{11}\text{B}) = 67$  Hz, CN), 110.7 (m, 1C, C1), 7.0 ppm (q, 1C,  $^1J(^{13}\text{C}, ^1\text{H}) = 131$  Hz,  $\text{CH}_3$ ) [the signal of C3 was not observed]. [In the  $^{13}\text{C}\{^{13}\text{B}, ^1\text{H}\}$  and  $^{13}\text{C}\{^1\text{H}\}$  NMR spectra the signals of anion **B8b** were not observed.] Elemental analysis: calculated (%) for  $\text{C}_{10}\text{H}_3\text{BF}_4\text{KN}_3$ , C 41.27, H 1.04, N 14.44; found, C 40.88, H 1.11, N 14.10. (–)-ESI-MS,  $m/z$ ,  $[(\text{CH}_3\text{C}_6\text{F}_4)\{\text{B}(\text{CN})_3\}]^-$ : calculated 252.04 (100.0%), 251.04 (24.8%), 253.04 (10.8%); found 252.04 (100.0%), 251.04 (23.8%), 253.04 (10.3%).

**K[1-F<sub>3</sub>C-4-{(NC)<sub>3</sub>B}-2,3,5-F<sub>3</sub>-C<sub>6</sub>H]** (**KB9**): Method A was employed for the preparation of

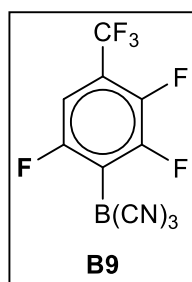

**KB9** using 2,3,4,5-tetrafluorobenzotrifluoride (ca. 0.5 mL, 3.4 mmol) and **K<sub>2</sub>1** (300 mg, 1.80 mmol). The reaction mixture was stirred at room temperature for 4 days. Yield: 460 mg (1.41 mmol, 78%). The product contained ca. 7% of other isomers.  $^{11}\text{B}$  NMR (160.5 MHz,  $(\text{CD}_3)_2\text{CO}$ ):  $\delta = -33.8$  ppm (s, 1B).  $^1\text{H}$  NMR (500.1 MHz,  $(\text{CD}_3)_2\text{CO}$ ):  $\delta = 7.24$  ppm (m, 1H).

$^1\text{H}\{^{11}\text{B}\}$  NMR (500.1 MHz,  $(\text{CD}_3)_2\text{CO}$ ):  $\delta = 7.24$  ppm (dddq, 1H,  $J(^{19}\text{F}, ^1\text{H}) = 8.7$  Hz, 4.9 Hz, 2.3 Hz, 0.6 Hz).  $^{19}\text{F}$  NMR (470.6 MHz,  $(\text{CD}_3)_2\text{CO}$ ):  $\delta = -61.9$  (dm, 3F,  $^4J(^{19}\text{F}, ^1\text{H}) = 12.8$  Hz,  $\text{CF}_3$ ),  $-103.7$  (s, 1F, F5),  $-124.1$  (s, 1F, F3),  $-147.5$  ppm (m, 1F, F2).  $^{13}\text{C}\{^1\text{H}\}$  NMR (125.8 MHz,  $(\text{CD}_3)_2\text{CO}$ ):  $\delta = 160.1$  (ddd, 1C,  $^1J(^{19}\text{F}, ^{13}\text{C}) = 246$  Hz,  $^{3/4}J(^{19}\text{F}, ^{13}\text{C}) \approx 11.5$  Hz, 3.5 Hz, C5), 153.3 (ddd, 1C,  $^1J(^{19}\text{F}, ^{13}\text{C}) = 249$  Hz,  $^2J(^{19}\text{F}, ^{13}\text{C}) \approx ^2J(^{19}\text{F}, ^{13}\text{C}) \approx 12$  Hz, C3), 145.4 (dm,

br, 1C,  $^1J(^{19}\text{F}, ^{13}\text{C}) = 253$  Hz, C2), 126.8 (q, 3C,  $^1J(^{13}\text{C}, ^{11}\text{B}) = 68$  Hz, CN), 122.7 (qddd, 1C,  $^1J(^{19}\text{F}, ^{13}\text{C}) = 272$  Hz,  $^{3/4}J(^{19}\text{F}, ^{13}\text{C}) = 4.3$  Hz, 2.7 Hz, 0.9 Hz,  $\text{CF}_3$ ), 122.5 (m, 1C, C4), 119.3 (qddd, 1C,  $^2J(^{19}\text{F}, ^{13}\text{C}) = 34.5$  Hz,  $^{2/3}J(^{19}\text{F}, ^{13}\text{C}) = 11.1$  Hz, 10.5 Hz, 1.9 Hz, C1), 109.3 ppm (dm, 1C,  $^2J(^{19}\text{F}, ^{13}\text{C}) = 31.7$  Hz, C6).  $^{13}\text{C}\{^1\text{H}\}$  NMR (75.5 Hz,  $(\text{CD}_3)_2\text{CO}$ ):  $\delta = 160.2$  (ddd, 1C,  $^1J(^{19}\text{F}, ^{13}\text{C}) = 246$  Hz,  $^{3/4}J(^{19}\text{F}, ^{13}\text{C}) \approx 11.3$  Hz, 3.3 Hz, C5), 153.3 (ddd, 1C,  $^1J(^{19}\text{F}, ^{13}\text{C}) = 249$  Hz,  $^2J(^{19}\text{F}, ^{13}\text{C}) \approx 13.3$  Hz, 12.2 Hz, C3), 145.4 (ddm, 1C,  $^1J(^{19}\text{F}, ^{13}\text{C}) = 253$  Hz,  $^2J(^{19}\text{F}, ^{13}\text{C}) \approx 18$  Hz, C2), 126.8 (s, 3C, CN), 122.7 (qm, 1C,  $^1J(^{19}\text{F}, ^{13}\text{C}) = 272$  Hz,  $\text{CF}_3$ ), 122.4 (ddm, 1C,  $^2J(^{19}\text{F}, ^{13}\text{C}) = 27.7$  Hz, 22.0 Hz, C4), 119.3 (qddd, 1C,  $^2J(^{19}\text{F}, ^{13}\text{C}) = 34.5$  Hz,  $^{2/3}J(^{19}\text{F}, ^{13}\text{C}) \approx 10.8$  Hz (2 $\times$ ), 1.9 Hz, C1), 109.3 ppm (ddq, 1C,  $^2J(^{19}\text{F}, ^{13}\text{C}) = 31.7$  Hz,  $^3J(^{19}\text{F}, ^{13}\text{C}) \approx 4.5$  Hz (2 $\times$ ), C6). Elemental analysis: calculated (%) for  $\text{C}_{10}\text{HBF}_6\text{KN}_3$ , C 36.73, H 0.31, N 12.85; found, C 36.71, H 0.36, N 13.06. (-)-ESI-MS,  $m/z$ ,  $[(\text{CF}_3\text{C}_6\text{F}_3\text{H})\text{B}(\text{CN})_3]^-$ : calculated 288.02 (100.0%), 287.02 (24.8%), 289.02 (10.8%); found 288.02 (100.0%), 287.02 (24.7%), 289.02 (10.4%).

**K[1-CH<sub>3</sub>O-4-{(NC)<sub>3</sub>B}-C<sub>6</sub>F<sub>4</sub>] (KB10a)** and **K[1-CH<sub>3</sub>O-3-{(NC)<sub>3</sub>B}-C<sub>6</sub>F<sub>4</sub>] (KB10b)**:

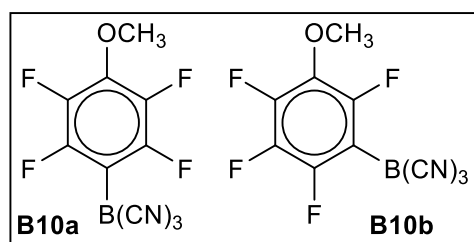

Method A was employed for the preparation of **KB10a** and **KB10b** using 2,3,4,5,6-pentafluoroaniline (ca. 0.6 mL, 4.2 mmol) and **K<sub>2</sub>1** (300 mg, 1.80 mmol). The reaction mixture was stirred at 60 °C overnight. Yield: 450 mg (1.47 mmol, 82%). The product was a mixture

of **KB10a** and **KB10b** (ratio 1:1). NMR spectroscopic data for **KB10a**:  $^{11}\text{B}$  NMR (160.5 MHz,  $(\text{CD}_3)_2\text{CO}$ ):  $\delta = -33.8$  ppm (s, 1B).  $^{19}\text{F}$  NMR (470.6 MHz,  $(\text{CD}_3)_2\text{CO}$ ):  $\delta = -133.8$  (m, 2F, F3/5),  $-160.2$  ppm (dd, 2F,  $^{2/3}J(^{19}\text{F}, ^{19}\text{F}) = 21.0$  Hz, 9.9 Hz, F2/6).  $^1\text{H}$  NMR (500.1 MHz,  $(\text{CD}_3)_2\text{CO}$ ):  $\delta = 4.05$  ppm (m, 3H).  $^{13}\text{C}\{^1\text{H}\}$  NMR (125.8 MHz,  $(\text{CD}_3)_2\text{CO}$ ):  $\delta = 148.7$  (dddd, 2C,  $^1J(^{19}\text{F}, ^{13}\text{C}) = 242$  Hz,  $^{3/4}J(^{19}\text{F}, ^{13}\text{C}) = 14$  Hz, 11 Hz, 4 Hz, C3/5), 141.4 (dm, br, 2C,  $^1J(^{19}\text{F}, ^{13}\text{C}) = 246$  Hz, C2/6), 138.3 (tt, 1C,  $^2J(^{19}\text{F}, ^{13}\text{C}) = 12.2$  Hz,  $^3J(^{19}\text{F}, ^{13}\text{C}) = 8.1$  Hz, C1), 127.1 (q, 3C,  $^1J(^{13}\text{C}, ^{11}\text{B}) = 67$  Hz, CN), 111.1 (m, 1C, C4), 62.7 ppm (t, 1C,  $^4J(^{19}\text{F}, ^{13}\text{C}) = 3$  Hz,  $\text{OCH}_3$ ).  $^{13}\text{C}\{^{19}\text{F}\}$  NMR (125.8 MHz,  $(\text{CD}_3)_2\text{CO}$ ):  $\delta = 148.7$  (s, 2C, C3/5), 141.4 (s, br, 2C, C2/6), 138.3 (s, 1C, C1), 127.1 (q, 3C,  $^1J(^{13}\text{C}, ^{11}\text{B}) = 67$  Hz, CN), 111.1 (q, 1C,  $^1J(^{13}\text{C}, ^{11}\text{B}) = 57$  Hz, C4), 62.6 ppm (q, 1C,  $^1J(^{13}\text{C}, ^1\text{H}) = 146$  Hz,  $\text{OCH}_3$ ). NMR spectroscopic data for **KB10b**:  $^{11}\text{B}$  NMR (160.5 MHz,  $(\text{CD}_3)_2\text{CO}$ ):  $\delta = -33.8$  ppm (s, 1B).  $^{19}\text{F}$  NMR (470.6 MHz,  $(\text{CD}_3)_2\text{CO}$ ):  $\delta = -124.6$  (s, 1F, F2),  $-133.6$  (m, 1F, F4),  $-153.1$  (dm, 1F,  $^3J(^{19}\text{F}, ^{19}\text{F}) \approx 20$  Hz, F6),  $-167.0$  ppm (ddd, 1F,  $^{3/5}J(^{19}\text{F}, ^{19}\text{F}) \approx 22$  Hz, 20 Hz, 10 Hz, F5).  $^1\text{H}$  NMR (500.1 MHz,  $(\text{CD}_3)_2\text{CO}$ ):  $\delta = 3.93$  ppm (m, 3H).  $^{13}\text{C}\{^1\text{H}\}$  NMR (125.8 MHz,  $(\text{CD}_3)_2\text{CO}$ ):  $\delta = 153.3$  (ddm,

1C,  $^1J(^{19}\text{F}, ^{13}\text{C}) = 244$  Hz,  $^{3/4}J(^{19}\text{F}, ^{13}\text{C}) = 13.5$  Hz, C2), 148.2 (dm, 1C,  $^1J(^{19}\text{F}, ^{13}\text{C}) = 242$  Hz, C4), 145.3 (dddd, 1C,  $^1J(^{19}\text{F}, ^{13}\text{C}) = 247$  Hz,  $^{2/3}J(^{19}\text{F}, ^{13}\text{C}) = 11.7$  Hz, 7.9 Hz, 5.9 Hz, C6), 137.8 (dm, br,  $^1J(^{19}\text{F}, ^{13}\text{C}) \approx 247$  Hz, 1C, C5), 134.5 (m, 1C, C1), 127.2 (q, 3C,  $^1J(^{13}\text{C}, ^{11}\text{B}) = 67$  Hz, CN), 109.9 (m, 1C, C3), 62.3 ppm (q, 1C,  $^4J(^{19}\text{F}, ^{13}\text{C}) = 3.6$  Hz, OCH<sub>3</sub>).  $^{13}\text{C}\{^{19}\text{F}\}$  NMR (125.8 MHz, (CD<sub>3</sub>)<sub>2</sub>CO):  $\delta = 153.3$  (s, 1C, C2), 148.2 (s, br, 1C, C4), 145.3 (s, 1C, C6), 137.8 (s, 1C, C5), 134.5 (s, 1C, C1), 127.2 (q, 3C,  $^1J(^{13}\text{C}, ^{11}\text{B}) = 67$  Hz, CN), 109.9 (q, 1C,  $^1J(^{13}\text{C}, ^{11}\text{B}) = 56$  Hz, C3), 62.3 ppm (q, 1C,  $^1J(^{13}\text{C}, ^1\text{H}) = 147$  Hz, OCH<sub>3</sub>). Elemental analysis: calculated (%) for C<sub>10</sub>H<sub>3</sub>BF<sub>4</sub>KN<sub>3</sub>O, C 39.12, H 0.98, N 13.69; found, C 38.59, H 0.89, N 15.15. (-)-ESI-MS, m/z, [(CH<sub>3</sub>OC<sub>6</sub>F<sub>4</sub>)B(CN)<sub>3</sub>]<sup>-</sup>: calculated 268.03 (100.0%), 267.03 (24.8%), 269.03 (10.8%); found 268.03 (100.0%), 267.03 (25.5%), 269.03 (10.9%). Crystals of **KB10a** suitable for an X-ray diffraction study were obtained from an *isopropanol* solution by slow evaporation of the solvent.

**K[1-NC-4-{(NC)<sub>3</sub>B}-C<sub>6</sub>F<sub>4</sub>] (KB11a)**: Method A was employed for the preparation of **KB11a**

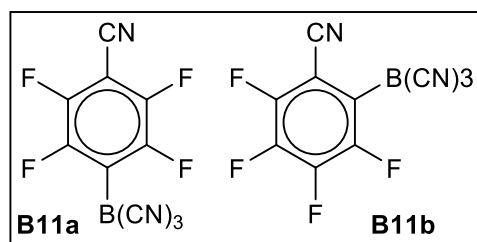

using 2,3,4,5,6-pentafluorobenzonitrile (ca. 0.45 mL, 3.6 mmol) and **K21** (300 mg, 1.80 mmol). The arene was added at -100 °C and slowly warmed up to room temperature. The dark raw product was a mixture of **KB11a**, **K[1-NC-2-{(NC)<sub>3</sub>B}-C<sub>6</sub>F<sub>4</sub>] (KB11b)** and

**K[B(CN)<sub>4</sub>]** (ratio 2.5:1.5:1.0). Yield: ca. 350 mg. Upon slow addition of CH<sub>2</sub>Cl<sub>2</sub> to the THF layers several fractions were obtained which resulted in an enrichment of the main and the side product, respectively. NMR spectroscopic data for **KB11a**:  $^{11}\text{B}$  NMR (160.5 MHz, (CD<sub>3</sub>)<sub>2</sub>CO):  $\delta = -33.8$  ppm (tt, 1B,  $^3J(^{19}\text{F}, ^{11}\text{B}) = 7.4$  Hz,  $^4J(^{19}\text{F}, ^{11}\text{B}) = 2.7$  Hz).  $^{19}\text{F}$  NMR (470.6 MHz, (CD<sub>3</sub>)<sub>2</sub>CO):  $\delta = -129.8$  (m, 2F, F3/5), -136.8 (m, 2F, F2/6).  $^{13}\text{C}\{^1\text{H}\}$  NMR (125.8 MHz, (CD<sub>3</sub>)<sub>2</sub>CO):  $\delta = 148.2$  (dddd, 2C,  $^1J(^{19}\text{F}, ^{13}\text{C}) = 246$  Hz,  $^{2/3/4}J(^{19}\text{F}, ^{13}\text{C}) \approx 11$  Hz (2×), 4 Hz, C3/5), 147.6 (dm, 2C,  $^1J(^{19}\text{F}, ^{13}\text{C}) = 259$  Hz, 2/6), 126.0 (q, 3C,  $^1J(^{13}\text{C}, ^{11}\text{B}) = 68$  Hz, B-CN), 108.6 (t, 1C,  $^3J(^{19}\text{F}, ^{13}\text{C}) = 3.9$  Hz, Ph-CN), 93.8 ppm (tt, 1C,  $^2J(^{19}\text{F}, ^{13}\text{C}) = 17.4$  Hz,  $^3J(^{19}\text{F}, ^{13}\text{C}) = 3.2$  Hz, C1) [the signal of C4 is covered by the signal of the B(CN)<sub>3</sub> group].  $^{13}\text{C}\{^{19}\text{F}\}$  NMR (125.8 MHz, (CD<sub>3</sub>)<sub>2</sub>CO):  $\delta = 148.2$  (s, 2C, C3/5), 147.6 (m, 2C, C2/6), 126.0 (q, 3C,  $^1J(^{13}\text{C}, ^{11}\text{B}) = 68$  Hz, B-CN), 108.7 (s, 1C, Ph-CN), 93.8 ppm (s, 1C, C1) [the signal of C4 is covered by the signal of the B(CN)<sub>3</sub> group]. NMR spectroscopic data for the side product **KB11b**:  $^{11}\text{B}$  NMR (160.5 MHz, (CD<sub>3</sub>)<sub>2</sub>CO):  $\delta = -32.4$  ppm (dm, 1B,  $^3J(^{19}\text{F}, ^{11}\text{B}) \approx 7.2$  Hz).  $^{19}\text{F}$  NMR (470.6 MHz, (CD<sub>3</sub>)<sub>2</sub>CO):  $\delta = -127.9$  (m, 1F, F3), -133.8 (m, 1F, F6), -149.0 (m, 1F, F4), -156.8 ppm (ddd, 1F,  $^3J(^{19}\text{F}, ^{19}\text{F}) = 19.8$  Hz (2×),  $^4J(^{19}\text{F}, ^{19}\text{F}) = 5.6$  Hz, F5).

$^{13}\text{C}\{^1\text{H}\}$  NMR (125.8 MHz,  $(\text{CD}_3)_2\text{CO}$ ):  $\delta$  = 151.2 (dm, 1C,  $^1J(^{19}\text{F}, ^{13}\text{C}) = 258$  Hz, C6), 149.9 (ddm, 1C,  $^1J(^{19}\text{F}, ^{13}\text{C}) = 246$  Hz,  $^2J(^{19}\text{F}, ^{13}\text{C}) = 10.0$  Hz, C3), 144.4 (dm, 1C,  $^1J(^{19}\text{F}, ^{13}\text{C}) \approx 262$  Hz, C4), 140.5 (ddd, 1C,  $^1J(^{19}\text{F}, ^{13}\text{C}) = 253$  Hz,  $^2J(^{19}\text{F}, ^{13}\text{C}) = 15.9$  Hz, 13.1 Hz,  $^3J(^{19}\text{F}, ^{13}\text{C}) = 4.4$  Hz, C5), 126.4 (q, 3C,  $^1J(^{13}\text{C}, ^{11}\text{B}) = 68$  Hz, B–CN), 111.6 (s, br, 1C, Ph–CN), 101.9 ppm (dd, 1C,  $^2J(^{19}\text{F}, ^{13}\text{C}) \approx 11$  Hz (2 $\times$ ), C1) [the signal of C2 is covered by the signal of the  $\text{B}(\text{CN})_3$  group].  $^{13}\text{C}\{^{19}\text{F}\}$  NMR (125.8 MHz,  $(\text{CD}_3)_2\text{CO}$ ):  $\delta$  = 151.2 (s, br, 1C, C6), 149.9 (s, 1C, C3), 144.4 (s, br, 1C, C4), 140.5 (s, 1C, C5), 126.4 (q, 3C,  $^1J(^{13}\text{C}, ^{11}\text{B}) = 68$  Hz, B–CN), 111.6 (s, br, 1C, Ph–CN), 101.9 ppm (s, 1C, C1) [the signal of C2 is covered by the signal of the  $\text{B}(\text{CN})_3$  group]. (–)-ESI-MS,  $m/z$ ,  $[(\text{NCC}_6\text{F}_4)\text{B}(\text{CN})_3]^-$ : calculated 263.02 (100.0%), 262.02 (24.8%), 264.02 (10.8%); found 263.02 (100.0%), 262.02 (24.7%), 264.02 (10.6%). Crystals of **KB11a** suitable for an X-ray diffraction study were obtained by slow diffusion of hexane in an ethyl acetate solution.

## 5. Table of Experimental and Calculated Chemical Shifts

**Table S1.** Selected experimental and calculated<sup>a</sup> chemical shifts<sup>b</sup> of the tricyanoborates.

| anion                              |    | B1           | B2a           | B2b           | B2c           | B3a           | B3b           | B3c           | B3d           | B4a           | B4b           | B4c           | B5            | B4d           | B6a <sup>c</sup> | B6b           |
|------------------------------------|----|--------------|---------------|---------------|---------------|---------------|---------------|---------------|---------------|---------------|---------------|---------------|---------------|---------------|------------------|---------------|
| $\delta(^{11}\text{B})$            | B  | -28.9        | -30.8         | -29.1         | -29.1         | -31.0         | -33.6         | -31.0         | -29.3         | -33.7         | -31.2         | -31.2         | -33.7         | -31.1         | -33.9            | -34.7         |
|                                    |    | <i>-33.1</i> | <i>-34.9</i>  | <i>-33.6</i>  | <i>-33.4</i>  | <i>-35.0</i>  | <i>-37.6</i>  | <i>-35.1</i>  | <i>-33.5</i>  | <i>-37.6</i>  | <i>-35.1</i>  | <i>-35.3</i>  | <i>-37.6</i>  | <i>-34.7</i>  | <i>-37.8</i>     | <i>-37.8</i>  |
| $\delta(^{19}\text{F}/^1\text{H})$ | X2 | 7.5          | -105.1        | <sup>d</sup>  | 7.5           | -132.5        | -101.4        | -111.7        | 7.0           | -127.1        | -137.2        | -106.7        | -132.7        | -113.4        | -132.1           | -133.8        |
|                                    |    | <i>8.1</i>   | <i>-119.7</i> | <i>7.8</i>    | <i>8.0</i>    | <i>-146.8</i> | <i>-113.7</i> | <i>-127.9</i> | <i>7.5</i>    | <i>-141.5</i> | <i>-153.2</i> | <i>-122.5</i> | <i>-146.6</i> | <i>-136.3</i> | <i>-146.0</i>    | <i>-157.7</i> |
|                                    | X3 | 7.3          | 7.0           | -116.1        | 7.0           | -142.3        | 6.8           | 7.0           | -112.7        | -145.6        | -136.7        | 7.1           | -141.8        | 7.1           | -165.4           | -133.8        |
|                                    |    | <i>7.2</i>   | <i>6.9</i>    | <i>-141.9</i> | <i>6.9</i>    | <i>-167.5</i> | <i>6.6</i>    | <i>6.7</i>    | <i>-139.4</i> | <i>-171.3</i> | <i>-162.8</i> | <i>6.6</i>    | <i>-168.5</i> | <i>7.3</i>    | <i>-192.9</i>    | <i>-152.7</i> |
|                                    | X4 | 7.2          | 7.3           | 6.9           | -118.6        | 7.1           | 7.3           | 7.0           | 6.8           | 7.2           | 7.1           | -137.8        | 7.3           | -             | -158.5           | -             |
|                                    |    | <i>7.1</i>   | <i>7.1</i>    | <i>6.7</i>    | <i>-147.6</i> | <i>6.8</i>    | <i>7.0</i>    | <i>6.7</i>    | <i>6.4</i>    | <i>6.7</i>    | <i>6.5</i>    | <i>-167.5</i> | <i>6.6</i>    | <i>-</i>      | <i>-188.7</i>    | <i>-</i>      |
|                                    | X5 | 7.3          | 7.1           | <sup>d</sup>  | 7.0           | 7.1           | 6.8           | -122.1        | -112.7        | 6.9           | -117.8        | -146.5        | -141.8        | -113.4        | -165.4           | -133.8        |
|                                    |    | <i>7.2</i>   | <i>7.0</i>    | <i>7.2</i>    | <i>6.9</i>    | <i>6.9</i>    | <i>6.6</i>    | <i>-148.9</i> | <i>139.4</i>  | <i>6.5</i>    | <i>-145.1</i> | <i>-173.7</i> | <i>-168.5</i> | <i>-136.3</i> | <i>-192.9</i>    | <i>-157.7</i> |
|                                    | X6 | 7.5          | 7.5           | <sup>d</sup>  | 7.5           | 7.3           | -101.4        | 7.2           | 7.0           | -106.8        | 7.0           | 7.3           | -132.7        | 7.1           | -132.1           | -133.8        |
|                                    |    | <i>8.1</i>   | <i>8.1</i>    | <i>7.7</i>    | <i>8.0</i>    | <i>7.8</i>    | <i>-113.7</i> | <i>7.8</i>    | <i>7.5</i>    | <i>-118.2</i> | <i>7.6</i>    | <i>7.8</i>    | <i>-146.6</i> | <i>7.3</i>    | <i>-146.0</i>    | <i>-152.7</i> |
| $\delta(^{13}\text{C})$            | CN | 129.6        | 128.5         | 129.1         | 129.5         | 128.1         | 128.2         | 128.0         | 128.6         | 127.5         | 127.5         | 127.8         | 127.0         | 128.3         | 126.7            | 127.4         |
|                                    |    | <i>134.0</i> | <i>132.4</i>  | <i>133.4</i>  | <i>133.8</i>  | <i>130.4</i>  | <i>131.9</i>  | <i>131.9</i>  | <i>132.9</i>  | <i>131.3</i>  | <i>131.4</i>  | <i>131.7</i>  | <i>130.8</i>  | <i>134.6</i>  | <i>130.7</i>     | <i>133.2</i>  |
|                                    | C1 | 140.6        | 126.2         | 144.1         | 136.5         | n.d.          | n.d.          | 128.8         | 146.4         | 116.4         | 131.0         | 123.4         | 118.3         | 127.5         | 111.6            | 116.7         |
|                                    |    | <i>155.2</i> | <i>140.4</i>  | <i>158.9</i>  | <i>150.1</i>  | <i>144</i>    | <i>128.3</i>  | <i>143.3</i>  | <i>161.1</i>  | <i>131.0</i>  | <i>145.8</i>  | <i>137.0</i>  | <i>133.2</i>  | <i>134.1</i>  | <i>125.5</i>     | <i>123.6</i>  |
|                                    | C2 | 133.3        | 166.3         | 119.3         | 135.0         | 153.5         | 166.1         | 162.2         | 115.4         | 152.6         | 149.7         | 160.9         | 148.3         | 162.2         | 148.4            | 148.2         |
|                                    |    | <i>139.6</i> | <i>176.6</i>  | <i>124.5</i>  | <i>140.7</i>  | <i>163.2</i>  | <i>176.2</i>  | <i>171.9</i>  | <i>120.1</i>  | <i>161.4</i>  | <i>158.8</i>  | <i>170.3</i>  | <i>157.2</i>  | <i>171.5</i>  | <i>157.2</i>     | <i>156.9</i>  |
|                                    | C3 | 128.3        | 115.1         | 163.4         | 115.0         | 151.1         | 111.6         | 116.6         | 163.6         | 147.9         | 150.6         | 105.6         | 146.5         | 120.6         | 137.9            | 148.2         |
|                                    |    | <i>130.0</i> | <i>117.1</i>  | <i>172.2</i>  | <i>115.9</i>  | <i>159.8</i>  | <i>112.9</i>  | <i>117.2</i>  | <i>171.7</i>  | <i>156.3</i>  | <i>158.6</i>  | <i>106.0</i>  | <i>154.1</i>  | <i>124.5</i>  | <i>145.1</i>     | <i>156.9</i>  |
|                                    | C4 | 127.2        | 130.0         | 113.9         | 162.9         | 116.9         | 130.5         | 115.9         | 102.4         | 117.2         | 105.0         | 150.1         | 106.1         | 127.5         | 141.1            | 116.7         |
|                                    |    | <i>127.0</i> | <i>129.0</i>  | <i>112.9</i>  | <i>170.9</i>  | <i>116.1</i>  | <i>128.8</i>  | <i>114.6</i>  | <i>101.3</i>  | <i>115.3</i>  | <i>103.5</i>  | <i>157.0</i>  | <i>104.2</i>  | <i>134.1</i>  | <i>147.5</i>     | <i>123.6</i>  |
|                                    | C5 | 128.3        | 124.4         | 130.2         | 115.0         | 125.0         | 111.6         | 159.4         | 163.6         | 111.5         | 158.3         | 147.2         | 146.5         | 162.2         | 137.9            | 148.2         |
|                                    |    | <i>130.0</i> | <i>125.2</i>  | <i>130.4</i>  | <i>115.9</i>  | <i>124.6</i>  | <i>112.9</i>  | <i>167.8</i>  | <i>171.7</i>  | <i>111.2</i>  | <i>166.0</i>  | <i>154.6</i>  | <i>154.1</i>  | <i>171.5</i>  | <i>145.1</i>     | <i>156.9</i>  |
|                                    | C6 | 133.3        | 135.4         | 129.1         | 135.0         | 130.2         | 166.1         | 120.9         | 115.4         | 160.8         | 115.6         | 122.1         | 148.3         | 120.6         | 148.4            | 148.2         |
|                                    |    | <i>139.6</i> | <i>141.9</i>  | <i>135.8</i>  | <i>140.7</i>  | <i>135.8</i>  | <i>176.2</i>  | <i>126.9</i>  | <i>120.1</i>  | <i>171.5</i>  | <i>120.7</i>  | <i>128.3</i>  | <i>157.2</i>  | <i>124.5</i>  | <i>157.2</i>     | <i>156.9</i>  |

<sup>a</sup> B3LYP/6-311++G(2d,p) using geometries calculated at the B3LYP/6-311++G(2,p) level of theory; calculated values in italics; mean values where applicable. <sup>b</sup> Chemical shifts in ppm. <sup>c</sup> Literature values.<sup>10</sup> <sup>d</sup> A definite assignment even with the aid of calculated chemical shifts was not possible.



Table S1 continued.

| anion                     |                 | B11a   | B7     | B8a    | B10a   | B11b   | B11c <sup>e</sup> | B8b    | B10b   | B9     | BP2    | BP1          | Py1     | Py2    | Py3          |        |
|---------------------------|-----------------|--------|--------|--------|--------|--------|-------------------|--------|--------|--------|--------|--------------|---------|--------|--------------|--------|
| $\delta(^{11}\text{B})$   | B               | -33.8  | -33.8  | -33.8  | -33.8  | -32.4  |                   | -33.8  | -33.8  | -33.8  | -33.7  | -33.7        | B4      | -33.9  | -33.9        | -33.9  |
|                           |                 | -37.6  | -37.6  | -37.7  | -37.7  | -36.5  | -37.9             | -37.8  | -37.8  | -37.7  | -37.4  | -37.6        |         | -37.7  | -37.4        | -37.1  |
|                           |                 |        |        |        |        |        |                   |        |        |        |        |              | B2/6    | -      | -30.9        | -30.0  |
|                           |                 |        |        |        |        |        |                   |        |        |        |        |              |         | -      | -34.2        | -33.3  |
| $\delta(^{19}\text{F})^e$ | X2              | -136.8 | -144.3 | -146.7 | -160.2 | -      |                   | -109.2 | -124.6 | -147.5 | -141.7 | -141.6       |         | -96.0  | -            | -      |
|                           |                 | -158.6 | -166.7 | -173.7 | -186.4 | -      | -109.4            | -118.3 | -134.7 | -169.1 | -165.4 | -167.1       |         | -118.0 | -            | -      |
|                           | X3              | -129.8 | -130.4 | -134.1 | -133.8 | -127.9 | -                 | -      | -      | -124.1 | -131.7 | -131.4       |         | -134.7 | -108.3       | -107.5 |
|                           |                 | -143.2 | -144.5 | -148.2 | -149.5 | -143.6 | -                 | -      | -      | -133.5 | -150.8 | -145.3       |         | -149.3 | -123.6       | -125.2 |
|                           | X4              | -      | -      | -      | -      | -149.0 |                   | -130.4 | -133.6 | -      | -      | -            |         | -      | -            | -      |
|                           |                 | -      | -      | -      | -      | -174.9 | -119.4            | -144.8 | -148.5 | -      | -      | -            |         | -      | -            | -      |
|                           | X5              | -129.8 | -130.4 | -134.1 | -133.8 | -156.8 |                   | -169.6 | -167.0 | -103.7 | -131.7 | -131.4       |         | -134.7 | -132.4       | -107.5 |
|                           |                 | -143.2 | -144.5 | -148.2 | -146.0 | -187.7 | -192.6            | -195.9 | -193.3 | -121.0 | -150.8 | -145.3       |         | -149.3 | -152.6       | -125.2 |
|                           | X6              | -136.8 | -144.3 | -146.7 | -160.2 | -133.8 |                   | -140.5 | -153.1 | 7.24   | -141.7 | -141.6       |         | -96.0  | -94.7        | -      |
|                           |                 | -158.6 | -166.7 | -173.7 | -186.4 | -156.4 | -155.7            | -172.1 | -182.6 | 6.9    | -165.4 | -167.1       |         | -118.0 | -121.2       | -      |
| $\delta(^{13}\text{C})$   | CN              | 126.0  | 126.4  | 127.3  | 127.1  | 126.4  |                   | 127.5  | 127.2  | 126.8  | 126.7  | 126.7        | B4-CN   | 125.8  | <sup>d</sup> | 128.3  |
|                           |                 | 129.6  | 130.0  | 131.1  | 131.0  | 130.0  | 130.0             | 131.4  | 131.2  | 130.5  | 131.7  | 130.3        |         | 129.8  | 132.6        | 135.2  |
|                           |                 |        |        |        |        |        |                   |        |        |        |        |              | B2/6-CN | -      | <sup>d</sup> | 128.3  |
|                           |                 |        |        |        |        |        |                   |        |        |        |        |              |         | -      | 133.1        | 135.7  |
|                           | C1              | 93.8   | 108.8  | 116.0  | 138.3  | 101.9  |                   | 110.7  | 134.5  | 119.3  | 107.1  | 103.6        |         | -      | -            | -      |
|                           |                 | 93.4   | 110.7  | 115.2  | 141.3  | 108.8  | 91.1              | 111.9  | 138.3  | 121.4  | 112.5  | 106.0        |         | -      | -            | -      |
|                           | C2              | 147.6  | 144.5  | 145.6  | 141.4  | n.d.   |                   | 158.0  | 153.3  | 145.4  | 144.6  | 144.6        |         | 144.0  | 142.8        | 146.4  |
|                           |                 | 156.2  | 152.0  | 153.0  | 150.1  | 144.1  | 170.1             | 168.5  | 164.5  | 153.5  | 152.7  | 151.8        |         | 150.9  | 153.6        | 154.2  |
|                           | C3              | 148.2  | 148.8  | 148.1  | 148.7  | 149.9  |                   | n.d.   | 109.3  | 153.3  | 148.5  | 148.6        |         | 144.0  | 161.9        | 164.7  |
|                           |                 | 157.0  | 157.4  | 157.2  | 157.5  | 157.0  | 127.1             | 123.9  | 124.1  | 163.6  | 157.2  | 157.5        |         | 152.6  | 170.7        | 173.6  |
|                           | C4              | n.d.   | 123.6  | 114.4  | 111.1  | 144.4  |                   | 151.1  | 148.2  | 122.5  | 120.3  | 121.1        |         | 133.5  | <sup>d</sup> | 118.4  |
|                           |                 | 141.6  | 138.3  | 129.3  | 126.2  | 151.3  | 167.3             | 159.9  | 157.0  | 137.1  | 129.9  | 136.7        |         | 147.3  | 134.8        | 123.2  |
|                           | C5              | 148.2  | 148.8  | 148.1  | 148.7  | 140.5  |                   | 137.5  | 137.8  | 160.1  | 148.5  | 148.6        |         | 144.0  | 146.3        | 164.7  |
|                           |                 | 157.0  | 157.4  | 157.2  | 157.5  | 146.2  | 144.9             | 145.3  | 145.5  | 168.0  | 157.2  | 157.5        |         | 152.6  | 154.8        | 173.6  |
|                           | C6              | 147.6  | 144.5  | 145.6  | 141.4  | 151.2  |                   | 149.6  | 145.3  | 109.3  | 144.6  | 144.6        |         | 144.0  | 147.9        | 146.4  |
|                           |                 | 156.2  | 152.0  | 153.0  | 150.1  | 159.3  | 159.9             | 155.7  | 151.8  | 110.5  | 152.7  | 151.8        |         | 150.9  | 153.9        | 154.2  |
|                           | C <sub>Gr</sub> | 108.6  | 122.1  | 7.3    | 62.6   | 111.6  |                   | 7.0    | 62.3   | 122.7  | -      | <sup>f</sup> |         | -      | -            | -      |
|                           |                 | 114.2  | 135.2  | 7.8    | 62.1   | 115.4  | 114.2             | 7.4    | 61.7   | 135.8  | -      | <sup>f</sup> |         | -      | -            | -      |

<sup>e</sup> B11c = [1-H<sub>3</sub>C-3-((NC)<sub>2</sub>B)-C<sub>6</sub>F<sub>4</sub>]<sup>-</sup>. <sup>f</sup> Data of the second Ph-ring: C1': 105.8 (114.4), C2'/6': 145.4 (154.1), C3'/C5': 138.9 (146.0), C4': 143.3 (149.5); F2'/6': -139.8 (-155.4), F3'/5': -163.3 (-188.7), F4': -153.2 (-180.6).

**Table S1 continued.**

| anion                   |                         | N1           | N2     | N3     |       |
|-------------------------|-------------------------|--------------|--------|--------|-------|
| $\delta(^{11}\text{B})$ | B                       | -33.6        | -33.6  | -33.6  |       |
|                         |                         | -37.5        | -37.2  | -37.2  |       |
| $\delta(^{19}\text{F})$ | F1                      | -107.3       | -108.8 | -104.6 |       |
|                         |                         | -120.9       | -127.6 | -118.4 |       |
|                         | F3                      | -127.3       | -130.1 | -127.6 |       |
|                         |                         | -131.7       | -147.0 | -143.1 |       |
|                         | F4                      | -153.3       | -152.1 | -154.5 |       |
|                         |                         | -177.3       | -175.9 | -182.8 |       |
|                         | F5                      | -149.4       | -108.8 | -154.5 |       |
|                         |                         | -171.5       | -127.6 | -182.8 |       |
|                         | F6                      | -157.3       | -      | -127.6 |       |
|                         |                         | -186.5       | -      | -143.1 |       |
|                         | F7                      | -159.6       | -130.1 | -      |       |
|                         |                         | -189.1       | -147.0 | -      |       |
|                         | F8                      | -146.3       | -152.1 | -104.6 |       |
|                         |                         | -163.0       | -175.9 | -118.4 |       |
|                         | $\delta(^{13}\text{C})$ | CN           | 127.0  | 127.3  | n.d.  |
|                         |                         |              | 130.4  | 132.6  | 132.6 |
| C1                      |                         | <sup>d</sup> | 154.2  | n.d.   |       |
|                         |                         | 162.3        | 161.9  | 163.6  |       |
| C2                      |                         | 116.8        | 116.7  | n.d.   |       |
|                         |                         | 132.4        | 125.1  | 122.9  |       |
| C3                      |                         | <sup>d</sup> | 149.7  | n.d.   |       |
|                         |                         | 162.5        | 159.4  | 160.6  |       |
| C4                      |                         | <sup>d</sup> | 140.9  | n.d.   |       |
|                         |                         | 148.4        | 149.5  | 148.4  |       |
| C4a                     |                         | 112.2        | 112.9  | n.d.   |       |
|                         |                         | 115.4        | 117.1  | 119.6  |       |
| C5                      |                         | <sup>d</sup> | 154.2  | n.d.   |       |
|                         |                         | 149.4        | 161.9  | 148.4  |       |
| C6                      |                         | <sup>d</sup> | 116.7  | n.d.   |       |
|                         |                         | 146.5        | 125.1  | 160.6  |       |
| C7                      |                         | <sup>d</sup> | 149.7  | n.d.   |       |
|                         |                         | 145.1        | 159.4  | 122.9  |       |
| C8                      |                         | <sup>d</sup> | 140.9  | n.d.   |       |
|                         |                         | 151.3        | 149.5  | 163.6  |       |
| C8a                     |                         | 108.9        | 112.9  | n.d.   |       |
|                         |                         | 112.9        | 117.1  | 115.0  |       |

## 6. Crystal Structure Determination

All crystal data were collected on a Bruker X8-Apex II diffractometer with a CCD area detector and multi-layer mirror or graphite monochromated  $\text{Mo}_{K\alpha}$  radiation. The structures were solved by intrinsic phasing methods (SHELXT).<sup>11-12</sup> Refinement is based on full-matrix least-squares calculations on  $F^2$  (SHELXL).<sup>12-13</sup> All non-hydrogen atoms were refined anisotropically. Hydrogen atoms bonded to the phenyl rings of the anions were refined without any restraints. For all remaining CH moieties idealized bond lengths and angles were used and their isotropic displacement parameters were fixed to the equivalent isotropic displacement parameters of the respective parent carbon atom. The crystal of  $\text{K}_2\text{N}_2 \cdot 2\text{EtOAc}$  was a pseudo-merohedral twin with domains rotated by  $179.9^\circ$  around the real axis  $[-0.001 \ 0.000 \ 1.000]$ . The BASF parameter was refined to 50%. Calculations were carried out using the ShelXle graphical interface.<sup>14</sup> Molecular structure diagrams were drawn with the program Diamond 4.3.2.<sup>15</sup>

Crystallographic data have been deposited with the Cambridge Crystallographic Data Centre. Experimental details, crystal data, and CCDC numbers are collected in Table S2. These data can be obtained free of charge from The Cambridge Crystallographic Data Centre via [www.ccdc.cam.ac.uk/data\\_request/cif](http://www.ccdc.cam.ac.uk/data_request/cif).

**Table S2.** Crystal data and structure refinement details of the tricyanoborates.

| compound                                                      | <b>KB2a</b>                                                                                | <b>KB2b</b>                                     | <b>KB3a</b>                                                   | <b>KB3c</b>                                                   | <b>KB3d</b>                                                   | <b>[Et<sub>3</sub>NH]<sub>2</sub>B4d</b>                                     | <b>KB4b</b>                                                   | <b>KB4a</b>                                                   | <b>[Me<sub>3</sub>NH]B4c</b>                                   | <b>[Et<sub>4</sub>N]<sub>2</sub>B6b</b>                                      |
|---------------------------------------------------------------|--------------------------------------------------------------------------------------------|-------------------------------------------------|---------------------------------------------------------------|---------------------------------------------------------------|---------------------------------------------------------------|------------------------------------------------------------------------------|---------------------------------------------------------------|---------------------------------------------------------------|----------------------------------------------------------------|------------------------------------------------------------------------------|
| empirical formula                                             | C <sub>18</sub> H <sub>8</sub> B <sub>2</sub> F <sub>2</sub> K <sub>2</sub> N <sub>6</sub> | C <sub>9</sub> H <sub>4</sub> BFKN <sub>3</sub> | C <sub>9</sub> H <sub>3</sub> BF <sub>2</sub> KN <sub>3</sub> | C <sub>9</sub> H <sub>3</sub> BF <sub>2</sub> KN <sub>3</sub> | C <sub>9</sub> H <sub>3</sub> BF <sub>2</sub> KN <sub>3</sub> | C <sub>24</sub> H <sub>34</sub> B <sub>2</sub> F <sub>2</sub> N <sub>8</sub> | C <sub>9</sub> H <sub>2</sub> BF <sub>3</sub> KN <sub>3</sub> | C <sub>9</sub> H <sub>2</sub> BF <sub>3</sub> KN <sub>3</sub> | C <sub>12</sub> H <sub>13</sub> BF <sub>3</sub> N <sub>4</sub> | C <sub>28</sub> H <sub>40</sub> B <sub>2</sub> F <sub>4</sub> N <sub>8</sub> |
| <i>M</i> <sub>w</sub> [g mol <sup>-1</sup> ]                  | 446.12                                                                                     | 223.06                                          | 241.05                                                        | 241.05                                                        | 241.05                                                        | 494.21                                                                       | 259.05                                                        | 259.05                                                        | 281.07                                                         | 586.30                                                                       |
| colour                                                        | colourless                                                                                 | colourless                                      | colourless                                                    | colourless                                                    | colourless                                                    | colourless                                                                   | colourless                                                    | colourless                                                    | colourless                                                     | colourless                                                                   |
| <i>T</i> [K]                                                  | 100                                                                                        | 100                                             | 100                                                           | 100                                                           | 100                                                           | 100                                                                          | 100                                                           | 100                                                           | 100                                                            | 100                                                                          |
| crystal system                                                | triclinic                                                                                  | monoclinic                                      | triclinic                                                     | monoclinic                                                    | monoclinic                                                    | triclinic                                                                    | monoclinic                                                    | monoclinic                                                    | orthorhombic                                                   | triclinic                                                                    |
| space group                                                   | <i>P</i> -1                                                                                | <i>P</i> 2 <sub>1</sub> / <i>c</i>              | <i>P</i> -1                                                   | <i>P</i> 2 <sub>1</sub> / <i>n</i>                            | <i>P</i> 2 <sub>1</sub> / <i>c</i>                            | <i>P</i> -1                                                                  | <i>P</i> 2 <sub>1</sub> / <i>c</i>                            | <i>P</i> 2 <sub>1</sub> / <i>n</i>                            | <i>Ima</i> 2                                                   | <i>P</i> -1                                                                  |
| <i>a</i> [Å]                                                  | 9.0844(6)                                                                                  | 11.3175(10)                                     | 7.2218(4)                                                     | 7.3664(11)                                                    | 11.1415(11)                                                   | 7.2310(18)                                                                   | 7.1368(4)                                                     | 7.4212(4)                                                     | 7.7462(5)                                                      | 9.2925(5)                                                                    |
| <i>b</i> [Å]                                                  | 9.8593(6)                                                                                  | 12.5441(11)                                     | 7.3375(4)                                                     | 21.174(3)                                                     | 12.3048(12)                                                   | 10.113(3)                                                                    | 21.0081(11)                                                   | 21.5366(12)                                                   | 16.7938(10)                                                    | 13.9870(7)                                                                   |
| <i>c</i> [Å]                                                  | 12.0751(8)                                                                                 | 7.3312(6)                                       | 11.5902(7)                                                    | 7.3900(11)                                                    | 7.4382(7)                                                     | 10.502(3)                                                                    | 6.8083(3)                                                     | 7.4276(4)                                                     | 10.8073(7)                                                     | 19.7322(10)                                                                  |
| $\alpha$ [°]                                                  | 91.429(2)                                                                                  |                                                 | 100.165(2)                                                    |                                                               |                                                               | 98.148(9)                                                                    |                                                               |                                                               |                                                                | 103.804(2)                                                                   |
| $\beta$ [°]                                                   | 109.254(2)                                                                                 | 100.954(4)                                      | 95.640(2)                                                     | 117.188(4)                                                    | 99.762(3)                                                     | 105.678(9)                                                                   | 90.830(2)                                                     | 118.496(2)                                                    |                                                                | 92.966(2)                                                                    |
| $\gamma$ [°]                                                  | 90.945(2)                                                                                  |                                                 | 116.645(2)                                                    |                                                               |                                                               | 106.755(8)                                                                   |                                                               |                                                               |                                                                | 107.242(2)                                                                   |
| <i>V</i> [Å <sup>3</sup> ]                                    | 1020.35(11)                                                                                | 1021.83(15)                                     | 529.22(5)                                                     | 1025.3(3)                                                     | 1004.97(17)                                                   | 687.6(3)                                                                     | 1020.67(9)                                                    | 1043.31(10)                                                   | 1405.90(15)                                                    | 2357.8(2)                                                                    |
| <i>Z</i>                                                      | 2                                                                                          | 4                                               | 2                                                             | 4                                                             | 4                                                             | 1                                                                            | 4                                                             | 4                                                             | 4                                                              | 3                                                                            |
| $\rho_{\text{calcd}}$ [Mg m <sup>-3</sup> ]                   | 1.452                                                                                      | 1.450                                           | 1.513                                                         | 1.562                                                         | 1.593                                                         | 1.194                                                                        | 1.686                                                         | 1.649                                                         | 1.328                                                          | 1.239                                                                        |
| $\mu$ [mm <sup>-1</sup> ]                                     | 0.499                                                                                      | 0.498                                           | 0.500                                                         | 0.516                                                         | 0.527                                                         | 0.083                                                                        | 0.539                                                         | 0.527                                                         | 0.110                                                          | 0.092                                                                        |
| <i>F</i> (000) [e]                                            | 448                                                                                        | 448                                             | 240                                                           | 480                                                           | 480                                                           | 262                                                                          | 512                                                           | 512                                                           | 580                                                            | 930                                                                          |
| $\theta$ range [°]                                            | 2.376–26.372                                                                               | 1.833–26.791                                    | 1.822–26.798                                                  | 1.924–26.802                                                  | 1.855–26.811                                                  | 2.166–26.973                                                                 | 1.939–26.815                                                  | 1.891–26.798                                                  | 2.241–26.756                                                   | 1.072–26.886                                                                 |
| reflections collected                                         | 13952                                                                                      | 13906                                           | 7270                                                          | 8062                                                          | 9084                                                          | 9798                                                                         | 13961                                                         | 14316                                                         | 4838                                                           | 31095                                                                        |
| independent reflections [ <i>I</i> > 2 $\sigma$ ( <i>I</i> )] | 3639                                                                                       | 1792                                            | 2100                                                          | 1765                                                          | 1779                                                          | 1980                                                                         | 1886                                                          | 2035                                                          | 1477                                                           | 6261                                                                         |
| <i>R</i> (int)                                                | 0.0311                                                                                     | 0.0495                                          | 0.0195                                                        | 0.0373                                                        | 0.0481                                                        | 0.0646                                                                       | 0.0367                                                        | 0.0324                                                        | 0.0250                                                         | 0.0509                                                                       |
| data / restraints / parameters                                | 4180 / 0 / 303                                                                             | 2185 / 0 / 152                                  | 2258 / 0 / 145                                                | 2198 / 0 / 157                                                | 2139 / 0 / 157                                                | 2926 / 0 / 231                                                               | 2183 / 0 / 162                                                | 2236 / 0 / 162                                                | 1597 / 1 / 140                                                 | 10150 / 131 / 771                                                            |
| <i>R</i> 1 [ <i>I</i> > 2 $\sigma$ ( <i>I</i> )]              | 0.0272                                                                                     | 0.0369                                          | 0.0389                                                        | 0.0336                                                        | 0.0317                                                        | 0.0458                                                                       | 0.0284                                                        | 0.0272                                                        | 0.0287                                                         | 0.0624                                                                       |
| <i>wR</i> 2 (all data)                                        | 0.0677                                                                                     | 0.0876                                          | 0.1059                                                        | 0.0784                                                        | 0.0835                                                        | 0.1260                                                                       | 0.0647                                                        | 0.0657                                                        | 0.0686                                                         | 0.1745                                                                       |
| GOF on <i>F</i> <sup>2</sup>                                  | 1.037                                                                                      | 1.063                                           | 1.078                                                         | 1.053                                                         | 1.055                                                         | 0.984                                                                        | 1.051                                                         | 1.087                                                         | 1.030                                                          | 1.030                                                                        |
| largest diff. peak / hole [e Å <sup>-3</sup> ]                | 0.327 / -0.252                                                                             | 0.329 / -0.324                                  | 1.575 / -0.429                                                | 0.315 / -0.238                                                | 0.374 / -0.355                                                | 0.325 / -0.328                                                               | 0.399 / -0.202                                                | 0.382 / -0.219                                                | 0.179 / -0.136                                                 | 0.746 / -0.312                                                               |
| CCDC number                                                   | 1548900                                                                                    | 1548901                                         | 1548902                                                       | 1548903                                                       | 1548904                                                       | 1548893                                                                      | 1548906                                                       | 1548905                                                       | 1548895                                                        | 1548894                                                                      |

Table S2 continued.

| compound                                             | K <sub>2</sub> BP2·THF                                                                                     | KPy1                                                                        | K <sub>2</sub> Py2·OC(CH <sub>3</sub> ) <sub>2</sub>                                         | K <sub>3</sub> Py3·3THF·1.04H <sub>2</sub> O                                                                      | KB7·THF                                                                                                      | KB10a                                                            | KB11a                                                                       | K <sub>2</sub> N2·2EtOAc                                                      |
|------------------------------------------------------|------------------------------------------------------------------------------------------------------------|-----------------------------------------------------------------------------|----------------------------------------------------------------------------------------------|-------------------------------------------------------------------------------------------------------------------|--------------------------------------------------------------------------------------------------------------|------------------------------------------------------------------|-----------------------------------------------------------------------------|-------------------------------------------------------------------------------|
| empirical formula                                    | C <sub>26</sub> H <sub>16</sub> B <sub>2</sub> F <sub>8</sub> K <sub>2</sub> N <sub>6</sub> O <sub>2</sub> | C <sub>16</sub> B <sub>2</sub> F <sub>8</sub> K <sub>2</sub> N <sub>8</sub> | C <sub>14</sub> H <sub>6</sub> B <sub>2</sub> F <sub>3</sub> K <sub>2</sub> N <sub>7</sub> O | C <sub>52</sub> H <sub>52.17</sub> B <sub>6</sub> F <sub>4</sub> K <sub>6</sub> N <sub>20</sub> O <sub>8.01</sub> | C <sub>56</sub> H <sub>32</sub> B <sub>4</sub> F <sub>28</sub> K <sub>4</sub> N <sub>12</sub> O <sub>4</sub> | C <sub>10</sub> H <sub>3</sub> BF <sub>4</sub> KN <sub>3</sub> O | C <sub>20</sub> B <sub>2</sub> F <sub>8</sub> K <sub>2</sub> N <sub>8</sub> | C <sub>12</sub> H <sub>8</sub> BF <sub>3</sub> KN <sub>3</sub> O <sub>2</sub> |
| <i>M</i> <sub>w</sub> [g mol <sup>-1</sup> ]         | 696.27                                                                                                     | 556.06                                                                      | 445.08                                                                                       | 1460.91                                                                                                           | 1668.57                                                                                                      | 307.06                                                           | 604.10                                                                      | 333.12                                                                        |
| colour                                               | colourless                                                                                                 | colourless                                                                  | colourless                                                                                   | colourless                                                                                                        | colourless                                                                                                   | colourless                                                       | colourless                                                                  | colourless                                                                    |
| <i>T</i> [K]                                         | 100                                                                                                        | 100                                                                         | 100                                                                                          | 100                                                                                                               | 100                                                                                                          | 100                                                              | 100                                                                         | 100                                                                           |
| crystal system                                       | monoclinic                                                                                                 | orthorhombic                                                                | tetragonal                                                                                   | monoclinic                                                                                                        | monoclinic                                                                                                   | orthorhombic                                                     | triclinic                                                                   | monoclinic                                                                    |
| space group                                          | <i>C2</i>                                                                                                  | <i>Pbca</i>                                                                 | <i>I4<sub>1</sub>/a</i>                                                                      | <i>C2/c</i>                                                                                                       | <i>P2<sub>1</sub>/c</i>                                                                                      | <i>Pnma</i>                                                      | <i>P-1</i>                                                                  | <i>P2<sub>1</sub>/c</i>                                                       |
| <i>a</i> [Å]                                         | 28.487(4)                                                                                                  | 10.0487(6)                                                                  | 25.5118(15)                                                                                  | 41.3012(11)                                                                                                       | 12.5972(7)                                                                                                   | 10.9629(9)                                                       | 9.8453(7)                                                                   | 12.9371(9)                                                                    |
| <i>b</i> [Å]                                         | 12.3676(16)                                                                                                | 18.9832(12)                                                                 | 25.5118(15)                                                                                  | 8.4531(2)                                                                                                         | 32.4417(17)                                                                                                  | 8.0873(7)                                                        | 10.0627(7)                                                                  | 7.5514(5)                                                                     |
| <i>c</i> [Å]                                         | 8.8225(11)                                                                                                 | 22.2949(13)                                                                 | 12.1914(8)                                                                                   | 46.0735(11)                                                                                                       | 16.9137(9)                                                                                                   | 14.1771(10)                                                      | 13.4136(10)                                                                 | 14.3323(10)                                                                   |
| <i>α</i> [°]                                         |                                                                                                            |                                                                             |                                                                                              |                                                                                                                   |                                                                                                              |                                                                  | 87.223(3)                                                                   |                                                                               |
| <i>β</i> [°]                                         | 94.050(5)                                                                                                  |                                                                             |                                                                                              | 113.7870(10)                                                                                                      | 92.820(3)                                                                                                    |                                                                  | 87.467(3)                                                                   | 93.205(3)                                                                     |
| <i>γ</i> [°]                                         |                                                                                                            |                                                                             |                                                                                              |                                                                                                                   |                                                                                                              |                                                                  | 66.895(2)                                                                   |                                                                               |
| <i>V</i> [Å <sup>3</sup> ]                           | 3100.6(7)                                                                                                  | 4252.9(4)                                                                   | 7934.8(11)                                                                                   | 14718.9(6)                                                                                                        | 6903.8(6)                                                                                                    | 1256.95(17)                                                      | 1220.40(15)                                                                 | 1397.98(17)                                                                   |
| <i>Z</i>                                             | 4                                                                                                          | 8                                                                           | 16                                                                                           | 8                                                                                                                 | 4                                                                                                            | 4                                                                | 2                                                                           | 4                                                                             |
| <i>ρ</i> <sub>calcd</sub> [Mg m <sup>-3</sup> ]      | 1.492                                                                                                      | 1.737                                                                       | 1.490                                                                                        | 1.319                                                                                                             | 1.605                                                                                                        | 1.623                                                            | 1.644                                                                       | 1.583                                                                         |
| <i>μ</i> [mm <sup>-1</sup> ]                         | 0.389                                                                                                      | 0.539                                                                       | 0.525                                                                                        | 0.425                                                                                                             | 0.388                                                                                                        | 0.468                                                            | 0.477                                                                       | 0.423                                                                         |
| <i>F</i> (000) [e]                                   | 1400                                                                                                       | 2176                                                                        | 3552                                                                                         | 5986                                                                                                              | 3328                                                                                                         | 608                                                              | 592                                                                         | 672                                                                           |
| <i>θ</i> range [°]                                   | 1.433–26.785                                                                                               | 1.827–26.727                                                                | 1.596–26.030                                                                                 | 1.120–26.373                                                                                                      | 1.255–26.372                                                                                                 | 2.348–26.791                                                     | 2.202–26.372                                                                | 2.847–26.372                                                                  |
| reflections collected                                | 21628                                                                                                      | 28164                                                                       | 31833                                                                                        | 44601                                                                                                             | 89364                                                                                                        | 10502                                                            | 16011                                                                       | 17851                                                                         |
| independent reflections [ <i>I</i> > 2σ( <i>I</i> )] | 5996                                                                                                       | 3993                                                                        | 3088                                                                                         | 11477                                                                                                             | 7469                                                                                                         | 1158                                                             | 3659                                                                        | 2516                                                                          |
| <i>R</i> (int)                                       | 0.0318                                                                                                     | 0.0258                                                                      | 0.0442                                                                                       | 0.0285                                                                                                            | 0.1395                                                                                                       | 0.0522                                                           | 0.0465                                                                      | 0.0751                                                                        |
| data / restraints / parameters                       | 6608 / 1 / 415                                                                                             | 4508 / 0 / 325                                                              | 3902 / 12 / 322                                                                              | 15069 / 33 / 944                                                                                                  | 14119 / 218 / 1047                                                                                           | 1439 / 0 / 104                                                   | 5004 / 0 / 361                                                              | 2857 / 0 / 202                                                                |
| <i>R</i> 1 [ <i>I</i> > 2σ( <i>I</i> )]              | 0.0301                                                                                                     | 0.0575                                                                      | 0.0734                                                                                       | 0.0457                                                                                                            | 0.0552                                                                                                       | 0.0362                                                           | 0.0400                                                                      | 0.0500                                                                        |
| <i>wR</i> 2 (all data)                               | 0.0611                                                                                                     | 0.1509                                                                      | 0.1519                                                                                       | 0.1377                                                                                                            | 0.1311                                                                                                       | 0.0984                                                           | 0.0802                                                                      | 0.1260                                                                        |
| GOF on <i>F</i> <sup>2</sup>                         | 1.038                                                                                                      | 1.134                                                                       | 1.272                                                                                        | 1.052                                                                                                             | 1.009                                                                                                        | 1.072                                                            | 1.009                                                                       | 1.087                                                                         |
| largest diff. peak / hole [e Å <sup>-3</sup> ]       | 0.272 / -0.172                                                                                             | 1.293 / -0.546                                                              | 1.210 / -0.857                                                                               | 1.075 / -0.505                                                                                                    | 0.544 / -0.435                                                                                               | 0.495 / -0.270                                                   | 0.355 / -0.278                                                              | 0.920 / -0.478                                                                |
| CCDC number                                          | 1548896                                                                                                    | 1548910                                                                     | 1548898                                                                                      | 1548899                                                                                                           | 1548907                                                                                                      | 1548908                                                          | 1548909                                                                     | 1548897                                                                       |

## 7. Experimental and Calculated Bond Lengths

**Table S3.** Experimental and calculated<sup>a</sup> bond lengths<sup>b</sup> of the tricyanoborate anions.

| anion            | B2a          | B2b          | B3a          | B3c          | B3d          | B4a          | B4b          | B4c          | B4d          | B6a <sup>10</sup> | B6b <sup>c</sup>      |
|------------------|--------------|--------------|--------------|--------------|--------------|--------------|--------------|--------------|--------------|-------------------|-----------------------|
| <i>d</i> (B–CN)  | 1.605(3)     | 1.601(3)     | 1.598(3)     | 1.598(3)     | 1.600(3)     | 1.600(2)     | 1.602(2)     | 1.601(3)     | 1.601(3)     | 1.607(2)          | 1.588(5)              |
|                  | 1.597(2)     | 1.604(3)     | 1.606(3)     | 1.615(3)     | 1.601(2)     | 1.604(2)     | 1.605(2)     | 1.601(3)     | 1.600(2)     | 1.605(2)          | 1.578(4)              |
|                  | 1.605(2)     | 1.607(3)     | 1.605(3)     | 1.600(3)     | 1.608(3)     | 1.606(2)     | 1.599(2)     | 1.598(4)     | 1.603(3)     | 1.599(2)          | 1.602(4)              |
|                  | <i>1.599</i> | <i>1.599</i> | <i>1.598</i> | <i>1.598</i> | <i>1.598</i> | <i>1.599</i> | <i>1.597</i> | <i>1.598</i> | <i>1.604</i> | <i>1.597</i>      | <i>1.603</i>          |
| <i>d</i> (C–N)   | 1.145(2)     | 1.144(3)     | 1.142(3)     | 1.147(2)     | 1.145(2)     | 1.141(2)     | 1.143(2)     | 1.143(3)     | 1.145(2)     | 1.141(2)          | 1.128(4)              |
|                  | 1.146(2)     | 1.147(2)     | 1.145(3)     | 1.144(3)     | 1.144(2)     | 1.141(2)     | 1.142(2)     | 1.143(3)     | 1.146(2)     | 1.142(2)          | 1.143(4)              |
|                  | 1.147(2)     | 1.145(2)     | 1.145(3)     | 1.145(2)     | 1.148(2)     | 1.143(2)     | 1.145(2)     | 1.141(4)     | 1.144(2)     | 1.147(2)          | 1.145(4)              |
|                  | <i>1.157</i> | <i>1.157</i> | <i>1.156</i> | <i>1.156</i> | <i>1.157</i> | <i>1.156</i> | <i>1.156</i> | <i>1.156</i> | <i>1.157</i> | <i>1.156</i>      | <i>1.157</i>          |
| <i>d</i> (B–C1)  | 1.612(2)     | 1.614(3)     | 1.606(3)     | 1.611(3)     | 1.616(2)     | 1.613(2)     | 1.618(2)     | 1.618(4)     | 1.612(3)     | 1.626(2)          | 1.623(3)              |
|                  | <i>1.638</i> | <i>1.637</i> | <i>1.640</i> | <i>1.639</i> | <i>1.638</i> | <i>1.648</i> | <i>1.642</i> | <i>1.639</i> | <i>1.634</i> | <i>1.652</i>      | <i>1.644</i>          |
| <i>d</i> (C2–F2) | 1.378(2)     | -            | 1.352(3)     | 1.365(2)     | -            | 1.346(2)     | 1.360(2)     | 1.364(3)     | 1.370(2)     | 1.345(2)          | 1.356(3)              |
|                  | <i>1.361</i> | -            | <i>1.351</i> | <i>1.360</i> | -            | <i>1.346</i> | <i>1.350</i> | <i>1.356</i> | <i>1.370</i> | <i>1.344</i>      | <i>1.354</i>          |
| <i>d</i> (C3–F3) | -            | 1.373(2)     | 1.335(3)     | -            | 1.361(2)     | 1.360(2)     | 1.352(2)     | -            | -            | 1.348(2)          | 1.350(3)              |
|                  | -            | <i>1.369</i> | <i>1.358</i> | -            | <i>1.365</i> | <i>1.358</i> | <i>1.354</i> | -            | -            | <i>1.346</i>      | <i>1.356</i>          |
| <i>d</i> (C4–F4) | -            | -            | -            | -            | -            | -            | -            | 1.351(4)     | -            | 1.343(2)          | 1.616(3) <sup>d</sup> |
|                  | -            | -            | -            | -            | -            | -            | -            | <i>1.355</i> | -            | <i>1.344</i>      | <i>1.644</i>          |
| <i>d</i> (C5–F5) | -            | -            | -            | 1.372(2)     | 1.372(2)     | -            | 1.364(2)     | 1.353(4)     | -            | 1.344(2)          | 1.352(3)              |
|                  | -            | -            | -            | <i>1.368</i> | <i>1.365</i> | -            | <i>1.364</i> | <i>1.357</i> | -            | <i>1.345</i>      | <i>1.354</i>          |
| <i>d</i> (C6–F6) | -            | -            | -            | -            | -            | 1.360(2)     | -            | -            | -            | 1.351(2)          | 1.349(3)              |
|                  | -            | -            | -            | -            | -            | <i>1.356</i> | -            | -            | -            | <i>1.344</i>      | <i>1.356</i>          |
| <i>d</i> (C1–C2) | 1.381(2)     | 1.392(3)     | 1.383(3)     | 1.391(3)     | 1.399(2)     | 1.385(2)     | 1.385(2)     | 1.387(4)     | 1.374(3)     | 1.385(2)          | 1.373(4)              |
|                  | <i>1.394</i> | <i>1.401</i> | <i>1.393</i> | <i>1.395</i> | <i>1.403</i> | <i>1.394</i> | <i>1.394</i> | <i>1.394</i> | <i>1.392</i> | <i>1.394</i>      | <i>1.394</i>          |
| <i>d</i> (C2–C3) | 1.377(2)     | 1.385(3)     | 1.383(3)     | 1.378(3)     | 1.374(2)     | 1.381(2)     | 1.377(2)     | 1.379(5)     | 1.377(3)     | 1.383(2)          | 1.376(3)              |
|                  | <i>1.388</i> | <i>1.386</i> | <i>1.390</i> | <i>1.387</i> | <i>1.384</i> | <i>1.394</i> | <i>1.389</i> | <i>1.389</i> | <i>1.387</i> | <i>1.393</i>      | <i>1.391</i>          |
| <i>d</i> (C3–C4) | 1.389(3)     | 1.361(3)     | 1.371(4)     | 1.384(3)     | 1.377(3)     | 1.370(2)     | 1.376(2)     | 1.376(4)     | 1.396(2)     | 1.374(3)          | 1.380(4)              |
|                  | <i>1.394</i> | <i>1.383</i> | <i>1.384</i> | <i>1.394</i> | <i>1.386</i> | <i>1.380</i> | <i>1.385</i> | <i>1.384</i> | <i>1.402</i> | <i>1.385</i>      | <i>1.394</i>          |
| <i>d</i> (C4–C5) | 1.384(3)     | 1.375(3)     | 1.379(4)     | 1.374(4)     | 1.379(3)     | 1.388(2)     | 1.375(2)     | 1.380(5)     | 1.374(3)     | 1.370(3)          | 1.382(4)              |
|                  | <i>1.393</i> | <i>1.397</i> | <i>1.394</i> | <i>1.383</i> | <i>1.386</i> | <i>1.393</i> | <i>1.385</i> | <i>1.386</i> | <i>1.392</i> | <i>1.387</i>      | <i>1.394</i>          |
| <i>d</i> (C5–C6) | 1.388(2)     | 1.379(3)     | 1.387(3)     | 1.377(3)     | 1.380(3)     | 1.372(2)     | 1.377(2)     | 1.372(5)     | 1.377(3)     | 1.386(2)          | 1.374(3)              |
|                  | <i>1.396</i> | <i>1.392</i> | <i>1.394</i> | <i>1.386</i> | <i>1.384</i> | <i>1.385</i> | <i>1.384</i> | <i>1.386</i> | <i>1.387</i> | <i>1.389</i>      | <i>1.391</i>          |
| <i>d</i> (C6–C1) | 1.398(2)     | 1.397(3)     | 1.403(4)     | 1.397(3)     | 1.399(2)     | 1.393(2)     | 1.402(2)     | 1.396(4)     | 1.396(2)     | 1.387(3)          | 1.385(4)              |
|                  | <i>1.403</i> | <i>1.405</i> | <i>1.403</i> | <i>1.402</i> | <i>1.403</i> | <i>1.399</i> | <i>1.403</i> | <i>1.402</i> | <i>1.402</i> | <i>1.397</i>      | <i>1.394</i>          |

<sup>a</sup> B3LYP/6-311++G(d,p); calculated values in italics; mean values where applicable. <sup>b</sup> Bond lengths in Å. <sup>c</sup> Data of the second {B(CN)<sub>3</sub>} moiety: *d*(B–CN) = 1.589(4), 1.603(4), 1.597(4) Å [*calc.*: 1.603 Å]; *d*(C–N) = 1.134(4), 1.136(4), 1.145(3) Å [*calc.*: 1.157 Å]; <sup>d</sup> *d*(C4–B).

Table S3 continued.

| anion             | B11a     | B7       | B10a     | BP2 <sup>f</sup> |                               | Py1       | Py2       | Py3       |          |
|-------------------|----------|----------|----------|------------------|-------------------------------|-----------|-----------|-----------|----------|
| <i>d</i> (B–CN)   | 1.597(4) | 1.602(5) | 1.604(3) | 1.595(4)         | <i>d</i> (B–CN)               | at C2     | -         | 1.597(7)  | 1.590(3) |
|                   | 1.609(4) | 1.590(5) | 1.589(3) | 1.604(5)         |                               | -         | 1.590(7)  | 1.596(4)  |          |
|                   | 1.601(4) | 1.586(5) | 1.604(3) | 1.599(5)         |                               | -         | 1.601(6)  | 1.600(4)  |          |
|                   | 1.600    | 1.596    | 1.598    | 1.600            |                               | -         | 1.601     | 1.607     |          |
| <i>d</i> (C–N)    | 1.140(4) | 1.137(5) | 1.139(3) | 1.138(4)         | at C4                         | 1.591(4)  | 1.580(37) | 1.591(4)  |          |
|                   | 1.142(3) | 1.141(5) | 1.139(3) | 1.138(4)         |                               | 1.597(4)  | 1.594(31) | 1.604(3)  |          |
|                   | 1.146(3) | 1.138(5) | 1.139(3) | 1.142(4)         |                               | 1.594(4)  | 1.593(32) | 1.596(3)  |          |
|                   | 1.155    | 1.156    | 1.156    | 1.156            |                               | 1.596     | 1.602     | 1.606     |          |
|                   | at C6    |          |          |                  |                               | -         | -         | 1.589(3)  |          |
|                   |          |          |          |                  |                               | -         | -         | 1.597(3)  |          |
|                   |          |          |          |                  |                               | -         | -         | 1.597(3)  |          |
|                   |          |          |          |                  |                               | -         | -         | 1.606     |          |
| <i>d</i> (C–N)    |          |          |          |                  |                               | at C2     | -         | 1.144(7)  | 1.148(2) |
|                   |          |          |          |                  |                               | -         | 1.135(7)  | 1.144(4)  |          |
|                   |          |          |          |                  |                               | -         | 1.139(6)  | 1.137(4)  |          |
|                   |          |          |          |                  |                               | -         | 1.157     | 1.158     |          |
| at C4             |          |          |          |                  | 1.140(4)                      | 1.139(31) | 1.142(3)  |           |          |
|                   |          |          |          |                  | 1.144(4)                      | 1.137(27) | 1.137(3)  |           |          |
|                   |          |          |          |                  | 1.144(4)                      | 1.133(24) | 1.142(3)  |           |          |
|                   |          |          |          |                  | 1.156                         | 1.157     | 1.157     |           |          |
| at C6             |          |          |          |                  | -                             | -         | 1.140(3)  |           |          |
|                   |          |          |          |                  | -                             | -         | 1.146(3)  |           |          |
|                   |          |          |          |                  | -                             | -         | 1.144(2)  |           |          |
|                   |          |          |          |                  | -                             | -         | 1.158     |           |          |
| <i>d</i> (C2–F2)  | 1.343(3) | 1.342(5) | 1.349(3) | 1.343(3)         | <i>d</i> (C2–X2) <sup>e</sup> | 1.340(4)  | 1.627(6)  | 1.620(4)  |          |
|                   | 1.342    | 1.343    | 1.349    | 1.349            |                               | 1.345     | 1.639     | 1.639     |          |
| <i>d</i> (C3–F3)  | 1.353(3) | 1.344(4) | 1.346(3) | 1.350(3)         | <i>d</i> (C3–F3)              | 1.335(4)  | 1.366(5)  | 1.356(3)  |          |
|                   | 1.342    | 1.344    | 1.346    | 1.348            |                               | 1.343     | 1.353     | 1.363     |          |
| <i>d</i> (C4–B)   | 1.626(3) | 1.618(6) | 1.621(4) | 1.627(4)         | <i>d</i> (C4–B)               | 1.631(4)  | 1.728(26) | 1.620(3)  |          |
|                   | 1.654    | 1.653    | 1.650    | 1.649            |                               | 1.651     | 1.646     | 1.642     |          |
| <i>d</i> (C5–F5)  | 1.349(3) | 1.348(4) | 1.346(3) | 1.351(3)         | <i>d</i> (C5–F5)              | 1.345(4)  | 1.328(5)  | 1.374(3)  |          |
|                   | 1.341    | 1.345    | 1.347    | 1.349            |                               | 1.343     | 1.353     | 1.362     |          |
| <i>d</i> (C6–F6)  | 1.341(3) | 1.344(4) | 1.349(3) | 1.346(3)         | <i>d</i> (C6–X6) <sup>e</sup> | 1.337(4)  | 1.352(5)  | 1.617(4)  |          |
|                   | 1.342    | 1.343    | 1.352    | 1.348            |                               | 1.346     | 1.361     | 1.640     |          |
| <i>d</i> (C1–C2)  | 1.386(4) | 1.374(6) | 1.368(3) | 1.389(4)         | <i>d</i> (N–C2)               | 1.310(4)  | 1.352(5)  | 1.3445(3) |          |
|                   | 1.395    | 1.391    | 1.392    | 1.392            |                               | 1.312     | 1.349     | 1.347     |          |
| <i>d</i> (C2–C3)  | 1.374(3) | 1.368(6) | 1.391(3) | 1.378(4)         | <i>d</i> (C2–C3)              | 1.377(5)  | 1.374(5)  | 1.390(2)  |          |
|                   | 1.389    | 1.395    | 1.393    | 1.392            |                               | 1.387     | 1.400     | 1.397     |          |
| <i>d</i> (C3–C4)  | 1.387(4) | 1.370(5) | 1.386(3) | 1.384            | <i>d</i> (C3–C4)              | 1.385(4)  | 1.385(6)  | 1.382(3)  |          |
|                   | 1.397    | 1.394    | 1.393    | 1.393            |                               | 1.397     | 1.401     | 1.396     |          |
| <i>d</i> (C4–C5)  | 1.391(4) | 1.382(5) | 1.386(3) | 1.391(4)         | <i>d</i> (C4–C5)              | 1.387(4)  | 1.368(6)  | 1.386(4)  |          |
|                   | 1.399    | 1.398    | 1.397    | 1.396            |                               | 1.394     | 1.391     | 1.393     |          |
| <i>d</i> (C5–C6)  | 1.371(3) | 1.372(6) | 1.391(3) | 1.380(4)         | <i>d</i> (C5–C6)              | 1.376(4)  | 1.378(5)  | 1.380(2)  |          |
|                   | 1.385    | 1.385    | 1.387    | 1.388            |                               | 1.392     | 1.387     | 1.400     |          |
| <i>d</i> (C6–C1)  | 1.384(4) | 1.377(6) | 1.368(3) | 1.386(4)         | <i>d</i> (C6–N)               | 1.314(4)  | 1.296(5)  | 1.347(3)  |          |
|                   | 1.398    | 1.397    | 1.395    | 1.394            |                               | 1.309     | 1.300     | 1.345     |          |
| <i>d</i> (C1–Gr.) | 1.425(3) | 1.504(6) | 1.373(4) | 1.481(4)         |                               |           |           |           |          |
|                   | 1.423    | 1.506    | 1.367    | 1.485            |                               |           |           |           |          |

<sup>e</sup> X = F or B; <sup>f</sup> data for the second Ph ring: *d*(B–CN) = 1.601(4), 1.592(4), 1.612(4) Å [calc.: 1.600 Å]; *d*(C–N) = 1.143(3), 1.142(4), 1.136(4) Å [calc.: 1.156 Å]; *d*(C2–F2) = 1.343(3) Å [calc.: 1.348 Å]; *d*(C3–F3) = 1.350(3) Å [calc.: 1.349 Å]; *d*(C4–B) = 1.625(4) Å [calc.: 1.649 Å]; *d*(C5–F5) = 1.349(3) Å [calc.: 1.348 Å]; *d*(C6–F6) = 1.341(3) Å [calc.: 1.349 Å]; *d*(C1–C2) = 1.389(4) Å [calc.: 1.394 Å]; *d*(C2–C3) = 1.383(4) Å [calc.: 1.388 Å]; *d*(C3–C4) = 1.394(4) Å [calc.: 1.396 Å]; *d*(C4–C5) = 1.380(4) Å [calc.: 1.393 Å]; *d*(C5–C6) = 1.385(4) Å [calc.: 1.392 Å]; *d*(C6–C1) = 1.386(4) Å [calc.: 1.392 Å].

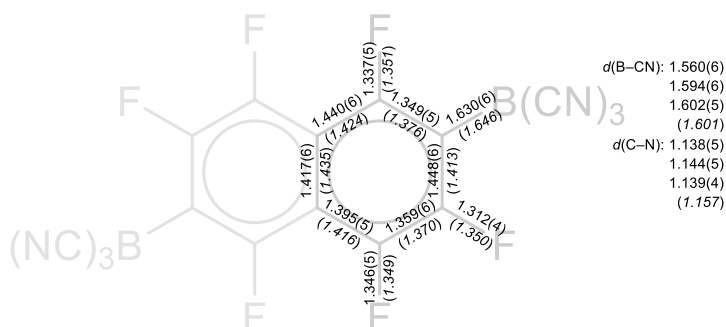

Figure S2: Experimental and calculated bond lengths [Å] of anion N2.

## 8. References

- 1 R. K. Harris, E. D. Becker, S. M. Cabral de Menezes, R. Goodfellow, P. Granger, *Pure Appl. Chem.*, 2001, **73**, 1795–1818.
- 2 G. R. Fulmer, A. J. M. Miller, N. H. Sherden, H. E. Gottlieb, A. Nudelman, B. M. Stoltz, J. E. Bercaw, K. I. Goldberg, *Organometallics*, 2010, **29**, 2176–2179.
- 3 W. Kohn, L. J. Sham, *Phys. Rev. A*, 1965, **140**, 1133–1138.
- 4 K. Wolinski, J. F. Hinton, P. Pulay, *J. Am. Chem. Soc.*, 1990, **112**, 8251–8260.
- 5 J. D. Kennedy, in *Multinuclear NMR* (Ed.: J. Mason), Plenum Press, New York, 1987, p. 221.
- 6 S. Berger, S. Braun, H.-O. Kalinowski, *NMR-Spektroskopie von Nichtmetallen - <sup>19</sup>F-NMR-Spektroskopie, Vol. 4*, Georg Thieme Verlag, Stuttgart, 1994.
- 7 M. J. Frisch, G. W. Trucks, H. B. Schlegel, G. E. Scuseria, M. A. Robb, J. R. Cheeseman, V. Barone, B. Mennucci, G. A. Petersson, H. Nakatsuji, M. Caricato, X. Xi, H. P. Hratchian, A. F. Izmaylov, J. Bloino, G. Zheng, J. L. Sonnenberg, M. Hada, M. Ehara, K. Toyota, R. Fukuda, J. Hasegawa, M. Ishida, T. Nakajima, Y. Honda, O. Kitao, H. Nakai, T. Vreven, J. J. A. Montgomery, J. E. Peralta, M. B. F. Ogliaro, J. J. Heyd, E. Brothers, K. N. Kudin, V. N. Staroverov, R. Kobayashi, J. Normand, K. Raghavachari, A. Rendell, J. C. Burant, S. S. Iyengar, J. Tomasi, M. Cossi, N. Rega, J. M. Millam, M. Klene, J. E. Knox, J. B. Cross, V. Bakken, C. Adamo, J. Jaramillo, R. Gomperts, R. E. Stratmann, O. Yazyev, A. J. Austin, R. Cammi, C. Pomelli, J. W. Ochterski, R. L. Martin, K. Morokuma, V. G. Zakrzewski, G. A. Voth, P. Salvador, J. J. Dannenberg, S. Dapprich, A. D. Daniels, Ö. Farkas, J. B. Foresman, J. V. Ortiz, J. Cioslowski, D. J. Fox, *Gaussian 09, Revision D.01*, Gaussian, Inc., Wallingford CT, USA, 2009.
- 8 W. L. F. Armarego, C. L. L. Chai, *Purification of Laboratory Chemicals*, 5 ed., Butterworth-Heinemann (Elsevier), 2003.
- 9 J. Landmann, F. Keppner, D. B. Hofmann, J. A. P. Sprenger, M. Häring, S. H. Zottnick, K. Müller-Buschbaum, N. V. Ignat'ev, M. Finze, *Angew. Chem.*, 2017, **129**, 2839–2843; *Angew. Chem. Int. Ed.* **2017**, *56*, 2795–2799.
- 10 J. Landmann, J. A. P. Sprenger, R. Bertermann, N. Ignat'ev, V. Bernhardt-Pitchougina, E. Bernhardt, H. Willner, M. Finze, *Chem. Commun.*, 2015, **51**, 4989–4992.



- 11 G. M. Sheldrick, *SHELXT, Program for Crystal Structure Solution*, Universität Göttingen, 2014.
- 12 G. M. Sheldrick, *Acta Crystallogr.*, 2008, **A64**, 112–122.
- 13 G. M. Sheldrick, *SHELXL-97, Program for Crystal Structure Refinement*, Universität Göttingen, 1997.
- 14 C. B. Hübschle, G. M. Sheldrick, B. Dittrich, *J. Appl. Crystallogr.*, 2011, **44**, 1281–1284.
- 15 K. Brandenburg, *Diamond 4.3.2*, Crystal Impact GbR, Bonn, Germany, 1997-2017.
